# Supplementary material for: Sodium-coupled electron transfer reactivity of metal–organic frameworks containing titanium clusters: the importance of cations in redox chemistry
Source: PubMed Central journal article supplement — Chem Sci. 2018 Nov 19;10(5):1322–31. doi: 10.1039/c8sc04138e (PMC6354900; doi:10.1039/c8sc04138e), 2018-11-19
Supplement: SC-010-C8SC04138E-s001.pdf [file SC-010-C8SC04138E-s001.pdf]

Supporting Information for:

## Sodium-Coupled Electron Transfer Reactivity of Metal-Organic Frameworks Containing Titanium Clusters: The Importance of Cations in Redox Chemistry

Caroline T. Saouma,<sup>‡,±,∞</sup> Chih-Chin Tsou,<sup>‡,δ,∞</sup> Sarah R. Richard,<sup>‡</sup> Rob Ameloot,<sup>‡</sup> Frederik Vermoortele,<sup>‡</sup> Simon Smolders,<sup>‡</sup> Bart Bueken,<sup>‡</sup> Antonio DiPasquale,<sup>‡</sup> Werner Kaminsky,<sup>‡</sup> Carolyn N. Valdez,<sup>‡,δ</sup> Dirk E. De Vos,<sup>\*,‡</sup> James M. Mayer<sup>\*,‡,δ</sup>

<sup>∞</sup> C.T.S. and C.-C. T. contributed equally to the manuscript.

<sup>‡</sup> Department of Chemistry, University of Washington, Box 351700, Seattle, Washington 98195-1700, U.S.A.

<sup>‡</sup> Centre for Surface Chemistry and Catalysis, KU Leuven – University of Leuven, Celestijnenlaan 200F p.o. box 2461, 3001 Leuven, Belgium, dirk.devos@kuleuven.be

<sup>±</sup> Department of Chemistry, University of Utah, 315 S 1400 E, Room 2020, Salt Lake City, UT 84102-0850, caroline.saouma@utah.edu

<sup>δ</sup> Department of Chemistry, Yale University, P.O. Box 208107, New Haven, CT 06520-8107, james.mayer@yale.edu

<sup>‡</sup> Department of Chemistry, University of California, Latimer Hall, Berkeley, CA 94720

### Table of Contents

|                                                                                                                                                                                                                                                           |    |
|-----------------------------------------------------------------------------------------------------------------------------------------------------------------------------------------------------------------------------------------------------------|----|
| A. General Considerations.....                                                                                                                                                                                                                            | 4  |
| B. X-ray Crystallography Measurements.....                                                                                                                                                                                                                | 5  |
| C. Synthesis of MOFs and Clusters.....                                                                                                                                                                                                                    | 6  |
| <b>Figure S1.</b> <sup>1</sup> H NMR spectrum (500 MHz, <i>d</i> <sub>8</sub> -toluene,) of Ti <sub>8</sub> O <sub>8</sub> (OOC <sup>t</sup> Bu) <sub>16</sub> (1) .....                                                                                  | 7  |
| <b>Figure S2.</b> Stacked <sup>1</sup> H NMR spectra of Ti <sub>8</sub> O <sub>8</sub> (OOC <sup>t</sup> Bu) <sub>16</sub> <sup>-</sup> showing the effect of solvent and counter-cation. ....                                                            | 8  |
| <b>Figure S3.</b> UV-vis spectra of [Ti <sub>8</sub> O <sub>8</sub> (OOC <sup>t</sup> Bu) <sub>16</sub> ]Na(THF) <sub>2</sub> (blue) and [Ti <sub>8</sub> O <sub>8</sub> (OOC <sup>t</sup> Bu) <sub>16</sub> ]CoCp* <sub>2</sub> (green) in benzene. .... | 8  |
| <b>Figure S4.</b> EPR spectrum of <b>2-CoCp*</b> <sub>2</sub> collected at 111K as a toluene glass (blue trace).....                                                                                                                                      | 9  |
| <b>Figure S5.</b> EPR spectrum of <b>2-Na</b> collected at 111K as a toluene glass (green trace).....                                                                                                                                                     | 9  |
| <b>Figure S6.</b> Stacked <sup>1</sup> H NMR spectra ( <i>d</i> <sub>8</sub> -THF, 300 MHz) of (top): <b>2-Na</b> ; (bottom): <b>2-Na</b> + 1 equiv. <i>p</i> -tolyl <sub>3</sub> N* <sup>+</sup> .....                                                   | 10 |
| D. Powder XRD.....                                                                                                                                                                                                                                        | 11 |
| <b>Figure S7.</b> Powder X-ray diffractograms of the different MIL-125(Ti) syntheses. ....                                                                                                                                                                | 11 |
| <b>Figure S8.</b> Powder XRD diffractograms of MIL-125 before and after 2.2 e- reduction and re-oxidation.....                                                                                                                                            | 12 |

|                                                                                                                                                                                                                                                                                                                                                                                                                                        |    |
|----------------------------------------------------------------------------------------------------------------------------------------------------------------------------------------------------------------------------------------------------------------------------------------------------------------------------------------------------------------------------------------------------------------------------------------|----|
| <b>Figure S9.</b> Pawley fit of 1 e <sup>-</sup> -reduced MIL-125. ....                                                                                                                                                                                                                                                                                                                                                                | 13 |
| <b>Figure S10.</b> Pawley fit of 2 e <sup>-</sup> -reduced MIL-125.....                                                                                                                                                                                                                                                                                                                                                                | 14 |
| <b>Figure S11.</b> Pawley fit of 8 e <sup>-</sup> -reduced MIL-125.....                                                                                                                                                                                                                                                                                                                                                                | 15 |
| E. SEM Images.....                                                                                                                                                                                                                                                                                                                                                                                                                     | 16 |
| <b>Figure S12:</b> SEM pictures of (top left) MIL-125, batch 1 (top right) MIL-125 deuterated, batch 4 (bottom left) small crystals of MIL-125, batch 2 and (bottom right) large crystals of MIL-125, batch 3. ....                                                                                                                                                                                                                    | 16 |
| F. Size Analysis .....                                                                                                                                                                                                                                                                                                                                                                                                                 | 17 |
| <b>Table S1.</b> Calculation of size/volume and fraction of Ti <sub>8</sub> clusters in outer shell of MIL-125 crystallites.....                                                                                                                                                                                                                                                                                                       | 17 |
| G. MOF Uptake Studies .....                                                                                                                                                                                                                                                                                                                                                                                                            | 18 |
| <b>Figure S13.</b> Stacked <sup>1</sup> H NMR Spectra (C <sub>6</sub> D <sub>6</sub> , 300 MHz) of sample A.....                                                                                                                                                                                                                                                                                                                       | 19 |
| <b>Table S2.</b> Relative integration of resonances for uptake study A. ....                                                                                                                                                                                                                                                                                                                                                           | 19 |
| <b>Figure S14.</b> Stacked <sup>1</sup> H NMR Spectra (C <sub>6</sub> D <sub>6</sub> , 300 MHz) of sample B.....                                                                                                                                                                                                                                                                                                                       | 20 |
| <b>Table S3.</b> Relative integration of resonances for uptake study B .....                                                                                                                                                                                                                                                                                                                                                           | 20 |
| <b>Figure S15.</b> Stacked <sup>1</sup> H NMR Spectra (C <sub>6</sub> D <sub>6</sub> , 300 MHz) of sample C.....                                                                                                                                                                                                                                                                                                                       | 21 |
| <b>Table S4.</b> Relative integration of resonances for uptake study C .....                                                                                                                                                                                                                                                                                                                                                           | 21 |
| <b>Figure S16.</b> Stacked <sup>1</sup> H NMR Spectra (C <sub>6</sub> D <sub>6</sub> , 300 MHz) of sample D.....                                                                                                                                                                                                                                                                                                                       | 22 |
| <b>Table S5.</b> Relative integration of resonances for uptake study D .....                                                                                                                                                                                                                                                                                                                                                           | 22 |
| <b>Figure S17.</b> Stacked <sup>1</sup> H NMR Spectra (C <sub>6</sub> D <sub>6</sub> , 300 MHz) of sample E .....                                                                                                                                                                                                                                                                                                                      | 23 |
| <b>Table S6.</b> Relative integration of resonances for uptake study E .....                                                                                                                                                                                                                                                                                                                                                           | 23 |
| H. Chemical Reduction of MIL-125 .....                                                                                                                                                                                                                                                                                                                                                                                                 | 24 |
| H.1. Reduction with CoCp* <sub>2</sub> .....                                                                                                                                                                                                                                                                                                                                                                                           | 24 |
| <b>Figure S18.</b> Exemplary <sup>1</sup> H NMR (500 MHz, d <sub>3</sub> -MeCN) spectra of (top): CoCp* <sub>2</sub> (47.4 ppm); (middle): [CoCp* <sub>2</sub> ]PF <sub>6</sub> (1.70 ppm); mother liquor of the reaction of MIL-125 (batch 2) with 2 equiv. of CoCp* <sub>2</sub> and 1.0 equiv. of NaBARF <sub>24</sub> .....                                                                                                        | 25 |
| <b>Figure S19.</b> Exemplary <sup>1</sup> H NMR (500 MHz, d <sub>7</sub> -DMF) spectra of (top): the reaction of MIL-125 (batch 1) with 2 equiv. of CoCp* <sub>2</sub> and 2 equiv. of NaBARF <sub>24</sub> ; (middle): the reaction of MIL-125 (batch 1) with 10 equiv. of CoCp* <sub>2</sub> and 10 equiv. of NaBARF <sub>24</sub> ; (bottom): terephthalic acid....                                                                 | 26 |
| <b>Figure S20.</b> Stacked X-band EPR Spectra of reduced MIL-125. (top, purple): photoreduced MIL-125 (0.25 e <sup>-</sup> /H <sup>+</sup> ); (middle, dark blue): MIL-125 reduced with 10 equiv. of CoCp* <sub>2</sub> /NaPF <sub>6</sub> ; (middle, light blue): reduced with 2 equiv. of CoCp* <sub>2</sub> /NaPF <sub>6</sub> ; (bottom, sky blue): MIL-125 reduced with 1 equiv. of CoCp* <sub>2</sub> /NaPF <sub>6</sub> ; ..... | 27 |
| H.2.Reduction with CrCp* <sub>2</sub> .....                                                                                                                                                                                                                                                                                                                                                                                            | 27 |
| <b>Figure S21.</b> (a)-(d) <sup>1</sup> H NMR spectra showing CrCp* <sub>2</sub> <sup>+</sup> is attached on the surface of charged MIL-125 after the reaction of CrCp* <sub>2</sub> and MIL-125 .....                                                                                                                                                                                                                                 | 28 |

|                                                                                                                                                                                                                                                                   |    |
|-------------------------------------------------------------------------------------------------------------------------------------------------------------------------------------------------------------------------------------------------------------------|----|
| <b>Figure S22.</b> (a)-(d) <sup>1</sup> H NMR spectra showing CrCp* <sub>2</sub> <sup>+</sup> is attached on the surface of charged NH <sub>2</sub> -MIL-125 after the reaction of CrCp* <sub>2</sub> and NH <sub>2</sub> -MIL-125 .....                          | 29 |
| <b>Figure S23.</b> Plot of e <sup>-</sup> transferred to NH <sub>2</sub> -MIL-125 (left axis) and fraction of CrCp* <sub>2</sub> ion-paired in reduced NH <sub>2</sub> -MIL-125 (right axis) versus equivalents of NaTFSI added .....                             | 30 |
| <b>Figure S24.</b> Plot of e <sup>-</sup> in NH <sub>2</sub> -MIL-125 versus equivalents of cryptand added (left axis), and equiv. of Na <sup>+</sup> in solution (right axis).....                                                                               | 31 |
| I. ICP-OES Analysis.....                                                                                                                                                                                                                                          | 32 |
| <b>Figure S25.</b> Standard addition method to determine the concentration of Ti or Na in several samples, A is MIL-125 without any added Na <sup>+</sup> , B-E are reduced with CoCp* <sub>2</sub> in the presence of NaPF <sub>6</sub> and F is the blank. .... | 33 |
| <b>Table S7.</b> Calculation of Na/Ti ratio in each sample, and the anticipated ratio for comparison. Sample F is the control experiment. ....                                                                                                                    | 33 |
| References .....                                                                                                                                                                                                                                                  | 34 |

## A. General Considerations

Unless noted, all manipulations were carried out using standard Schlenk or glove-box techniques under a dinitrogen atmosphere. Glassware was oven-dried for 24 h prior to use. Celite and molecular sieves were dried by heating to 300 °C under vacuum for 24 h. Unless otherwise noted, solvents were deoxygenated and dried by sparging with Ar followed by passage through Grubbs-style columns filled with activated alumina.<sup>1</sup> Acetonitrile was purchased from Burdick and Jackson® (< 5ppm low-water brand) and stored in an Ar pressurized stainless steel drum plumbed directly into a glove-box. Isopropanol was dried by refluxing over Mg turnings for 12 h and distilled under N<sub>2</sub>. All glove-box solvents were stored over activated 3 Å molecular sieves. Deuterated solvents were purchased from Cambridge Isotopes Laboratories, Inc. and were degassed and stored over activated 3 Å molecular sieves prior to use. *d*<sub>3</sub>-MeCN was dried over CaH<sub>2</sub> and vacuum transferred prior to storage over sieves. Methanol was degassed and stored over activated 3 Å molecular sieves. *d*<sub>8</sub>-THF was dried over sodium and benzophenone and then vacuum-transferred to a N<sub>2</sub>-filled flask. *d*<sub>3</sub>-MeCN was dried over KMnO<sub>4</sub>, followed by a vacuum-transfer into a flask containing CaH<sub>2</sub>. Deuterium solvents were not stored over molecular sieves (MS) due to a possible contamination of Na<sup>+</sup>/K<sup>+</sup> ion in 4 Å MS (Na<sub>2</sub>O•Al<sub>2</sub>O<sub>3</sub>•2SiO<sub>2</sub>) and 3 Å MS (2/3K<sub>2</sub>O•1/3Na<sub>2</sub>O•Al<sub>2</sub>O<sub>3</sub>• 2 SiO<sub>2</sub>). Elemental Analyses were performed at Complete Analysis Laboratories Inc. (Parsippany, NJ).

Reagents were purchased from Aldrich and unless noted, used without further purification. CoCp\*<sub>2</sub> and CrCp\*<sub>2</sub> were purified by dissolution into pentane, filtering through a Celite-lined frit, and removal of pentanes. TEMPO (2,2,6,6-tetramethylpiperidin-1-yl-oxyl) was sublimed under vacuum.<sup>2</sup> <sup>t</sup>Bu<sub>3</sub>ArO<sup>•</sup> was prepared according to the literature method.<sup>3</sup> [FeCp\*<sub>2</sub>]PF<sub>6</sub> was prepared by treatment of FeCp\*<sub>2</sub> with 1 equiv. of [NO]PF<sub>6</sub> in a benzene/acetonitrile mixture. [(*p*-tolyl)<sub>3</sub>N]PF<sub>6</sub> was prepared as described in the literature.<sup>4</sup> Sodium bis(trifluoromethane sulfonyl) imide (NaTFSI) was purified by the following procedures: (1) the NaTFSI suspension in dichloromethane was stirred for 6 h. After standing for 30 min, the upper solution was removed. (2) Procedure 1 was repeated 1 ten times. (3) NaTFSI was washed ten times with pentane, and then the solution was removed. (4) The solid was dried in a vacuum for 24 h. There was a small residual oxidizing impurity in the NaTFSI, 0.005 ± 0.001 mol%, that caused a small amount of oxidation of CrCp\*<sub>2</sub>. To remove possible water molecules in Ti-based MOFs, MIL-125 and NH<sub>2</sub>-MIL-125 were dried at 200 °C in a vacuum oven.

MIL-125<sup>8</sup> and NH<sub>2</sub>-MIL-125<sup>9</sup> were prepared by the reported procedures. MIL-125 of different sizes was prepared by using a controlled SBU approach described by patent EP 2398812B1. For the preparation of each material, the pivalate capped Ti<sub>8</sub>O<sub>8</sub> inorganic cluster Ti<sub>8</sub>O<sub>8</sub>(OOC<sup>t</sup>Bu)<sub>16</sub> was used.<sup>10</sup>

NMR spectra were collected on Bruker 300, 500 or Agilent 400, 500 MHz spectrometers, and <sup>1</sup>H chemical shifts were referenced to residual solvent. Data were recorded with enough delay time and acquisition time for allowing full relaxation of methylene signals of [2.2.2]-cryptand and *p*-tolyl ether. Chemical shifts were reported relative to TMS by referencing the residual solvent. MestReNova© (version 9.0.0) was used to deconvolute the overlapping peaks using the Line Fitting tools. The peak heights, widths, areas and the ratios of Gaussian to Lorentzian line-shapes were allowed to vary based on minimizing the residual. All of average data and error (i.e. standard deviation) were calculated from three NMR experiments.



EPR spectra were collected on a Bruker EMX CW X-band spectrometer outfitted with a cryo-cooled cavity. Spectra of MOFs were collected from solid samples (7 – 19 mg) at 107 K at 9.29 GHz. Spectra of reduced molecular clusters were collected in a toluene glass (1-2 mM) at 111 K at 9.29 GHz. EPR spectra of the reduced clusters were fit to a Lorentzian using the W95EPR program (Monte Carlo fit).<sup>7</sup>

Optical spectroscopy measurements were taken on a Hewlett-Packard 8453 diode array spectrophotometer equipped with a Unisoku sample holder that has a temperature controller and magnetic stirrer. Unless noted, all optical spectroscopy measurements were done in MeCN. Samples were taken using quartz cuvettes sealed to a Teflon valve (Kontes) and 14/20 ground-glass joint.

## B. X-ray Crystallography Measurements

Low-temperature diffraction data for [Ti<sub>8</sub>O<sub>8</sub>(OOC<sup>t</sup>Bu)<sub>16</sub>]Na(THF)<sub>2</sub> were collected on a Bruker APEXII single crystal diffractometer coupled to a Bruker APEXII CCD detector with graphite-monochromated Mo K $\alpha$  radiation ( $\lambda = 0.71073 \text{ \AA}$ ), performing  $\varphi$ - and  $\omega$ -scans at 100 K. The structures were solved by direct or Patterson methods using SHELXS<sup>3</sup> and refined against  $F^2$  on all data by full-matrix least squares with SHELXL-97.<sup>4</sup> All non-hydrogen atoms were refined anisotropically. All hydrogen atoms were included into the model at geometrically calculated positions and refined using a riding model. The isotropic displacement parameters of all hydrogen atoms were fixed to 1.2 times the U value of the atoms they are linked to (1.5 times for methyl groups). The structure was refined using established methods.<sup>5</sup>

Low-temperature diffraction data for [Ti<sub>8</sub>O<sub>8</sub>(OOC<sup>t</sup>Bu)<sub>16</sub>]CoCp\*<sub>2</sub> was collected at a crystal-to-detector distance was 60 mm and exposure time was 60 seconds per frame using a scan width of 1.0°. Data collection was 100.0% complete to 25.000° in  $\theta$ . A total of 66708 reflections were collected covering the indices,  $-23 \leq h \leq 23$ ,  $-19 \leq k \leq 13$ ,  $-45 \leq l \leq 35$ . 6759 reflections were found to be symmetry independent, with an  $R_{\text{int}}$  of 0.0835. Indexing and unit cell refinement indicated a primitive, tetragonal lattice. The space group was found to be P 4/n c c (No. 130). The data were integrated using the Bruker SAINT software program and scaled using the SADABS software program. Solution by iterative methods (SIR-2011) produced a complete heavy-atom phasing model consistent with the proposed structure. All non-hydrogen atoms were refined anisotropically by full-matrix least-squares (SHELXL-2013). All hydrogen atoms were placed using a riding model. Their positions were constrained relative to their parent atom using the appropriate HFIX command in SHELXL-2013. SAME restraints were used to treat all disordered <sup>t</sup>Bu groups, keeping bond distances and angles similar using an esd of 0.02. SQUEEZE was used to treat the disordered [CoCp\*<sub>2</sub>]<sup>+</sup>, which sat on a crystallographically imposed 4-fold symmetry operation, as well as disordered MeCN solvent occupying the 6706 Å<sup>3</sup> of void space within the unit cell. The molecular formula, weight, density, and F(000) have been updated to reflect the estimated composition of the void space.

Data for these crystal structure(s) have been deposited and can be found as:

CCDC 1868235

CCDC 1868236

### C. Synthesis of MOFs and Clusters

MIL-125 of different sizes was prepared by using a modified procedure to the controlled SBU approach described by patent EP 2398812B1. For the preparation of each material, the pivalate capped Ti<sub>8</sub>O<sub>8</sub> inorganic cluster Ti<sub>8</sub>O<sub>8</sub>(OOC<sup>t</sup>Bu)<sub>16</sub> was used.<sup>10</sup>

**MIL-125(Ti), batch 1.** 3 g Terephthalic acid was dissolved in 50 mL of hot DMF (solution a) and simultaneously, 2.4 g of Ti<sub>8</sub>O<sub>8</sub>(OOC<sup>t</sup>Bu)<sub>16</sub> was dissolved in a mixture of 25 ml methanol and 50 mL DMF (solution b) and put in a sonication bath until full dissolution. After cooling down to room temperature, solution a was mixed with solution b in a Schott® pressure plus bottle of 250 ml and placed in a pre-heated oven of 100°C for 4 days. After the synthesis, the white powder was recovered by centrifugation and thoroughly washed with hot DMF (2 x 250 mL), to remove any unreacted terephthalic acid, and methanol (3 x 100 mL) to displace any adsorbed DMF. After the last washing steps, the powder was dried under vacuum at 60°C.

**Small crystals of MIL-125(Ti), batch 2.** Small, sphere like MIL-125(Ti) crystals with sizes between 150 and 250 nm were synthesized by adding 5 molar equivalents of excess benzoic acid as a modulator using the same synthesis protocol as for the normal MIL-125(Ti).

**Large crystals of MIL-125(Ti), batch 3.** Large, octahedral MIL-125(Ti) crystals with larger crystal sizes between 2 and 5 μm were synthesized by adding 3 molar equivalents of excess benzoic acid as a modulator using the same synthesis protocol as for the normal MIL-125(Ti).

**MIL-125(Ti) deuterated, batch 4.** MIL-125(Ti) with deuterated terephthalic rings was synthesized as the normal MIL-125(Ti) by replacing terephthalic acid by *d*<sub>4</sub>-terephthalic acid.

**NH<sub>2</sub>-MIL-125(Ti).** 11.9 g of 2-aminoterephthalic acid and 10.2 mL tetrabutyl titanate were dissolved in a mixture of 250 mL DMF, 50 mL methanol and 10 mL of acetic acid. The solution was subsequently refluxed for 24h and after the synthesis, the yellow powder was recovered by centrifugation and thoroughly washed with hot DMF (2 x 250 mL), to remove any unreacted linker, and methanol (3 x 100 mL) to displace any adsorbed DMF. After the last washing steps, the powder was dried under vacuum at 60°C.

**Synthesis of [Ti<sub>8</sub>O<sub>8</sub>(OOC<sup>t</sup>Bu)<sub>16</sub>]Na(THF)<sub>2</sub>.** A solution of Ti<sub>8</sub>O<sub>8</sub>(OOC<sup>t</sup>Bu)<sub>16</sub> (206.2 mg, 0.09686 mmol) in ~ 6 mL THF was added to a stirring 0.22 wt % Na/Hg amalgam (1.0676 g, 0.1017 mmol). An immediate color change from colorless to blue was noted. The solution was vigorously stirred for 6 h, after which the volatiles were removed by vacuum. The resulting blue solids were taken up in ~ 5 mL THF, filtered through a Celite-lined frit, and layered with MeCN (~ 10 mL). Crystals suitable for XRD were obtained (crop 1: 158.5 mg, 71.3 %). Concentration of the mother liquor and crystallization by addition of acetonitrile gives a second crop. <sup>1</sup>H NMR (*d*<sub>8</sub>-THF, 500 MHz): δ 3.62 (m, overlapping with solvent, 8H), 1.76 (m, overlapping with solvent, 8H), 1.415 (s, 72 H), 1.234 (s, 72 H). (*d*<sub>8</sub>-toluene, 700 MHz): δ 3.74 (bs), 1.63 (bs), 1.530 (s, 72 H), 1.416 (s, 72 H). (C<sub>6</sub>D<sub>6</sub>, 300 MHz): δ 3.63 (bs), 1.63 (bs), 1.559 (s, 72 H), 1.458 (s, 72 H). UV-vis (C<sub>6</sub>H<sub>6</sub>) λ<sub>max</sub>, nm (ε, M<sup>-1</sup> cm<sup>-1</sup>): 414 (sh, 220), 515 (450), 790 (680). EPR (toluene, 111 K): g = [1.950, 1.904, 1.781]; W = [53.0, 56.0, 81.0]. Anal. Calcd. for Ti<sub>8</sub>O<sub>42</sub>C<sub>88</sub>H<sub>160</sub>Na: C 46.0; H 7.02; N 0. Found: C 45.96; H 7.12; N < 0.02.

**Synthesis of [Ti<sub>8</sub>O<sub>8</sub>(OOC<sup>t</sup>Bu)<sub>16</sub>]CoCp\*<sub>2</sub>.** To a stirring solution of Ti<sub>8</sub>O<sub>8</sub>(OOC<sup>t</sup>Bu)<sub>16</sub> (126.2 mg, 0.0593 mmol) in ~ 3 mL benzene was added a solution of CoCp\*<sub>2</sub> (20.5 mg, 0.0622 mmol) in ~ 3 mL benzene. The solution immediately became blue. The solution was stirred for 20 min, after

which the volatiles were removed by vacuum. The resulting blue solids were taken up in ~ 1 mL THF, filtered through a Celite-lined pipette, and layered with MeCN (~ 2 mL). Crystals suitable for XRD were obtained (55.8 mg, 38.3 %). <sup>1</sup>H NMR (*d*<sub>8</sub>-THF, 500 MHz): δ 1.79 (s, 30H), 1.373 (s, 72 H), 1.217 (s, 72 H). (*d*<sub>8</sub>-toluene, 500 MHz): δ 1.617 (s, 72H), 1.457 (bs, overlapping with singlet at 1.433), 1.433 (s, overlapping with singlet at 1.457). (C<sub>6</sub>D<sub>6</sub>, 500 MHz): δ 1.656 (s, 72H), 1.500 (s, 72 H), 1.401 (s, 30H). UV-vis (C<sub>6</sub>H<sub>6</sub>) λ<sub>max</sub>, nm (ε, M<sup>-1</sup> cm<sup>-1</sup>): 410 (sh, 580), 515 (470), 790 (630). EPR (toluene, 111 K): g = [1.919, 1.899, 1.783]; W = [98.0, 228, 258]. Anal. Calcd. for Ti<sub>8</sub>O<sub>40</sub>C<sub>100</sub>H<sub>174</sub>Co: C 48.85; H 7.13; N 0. Found: C 48.72; H 7.17; N < 0.02.

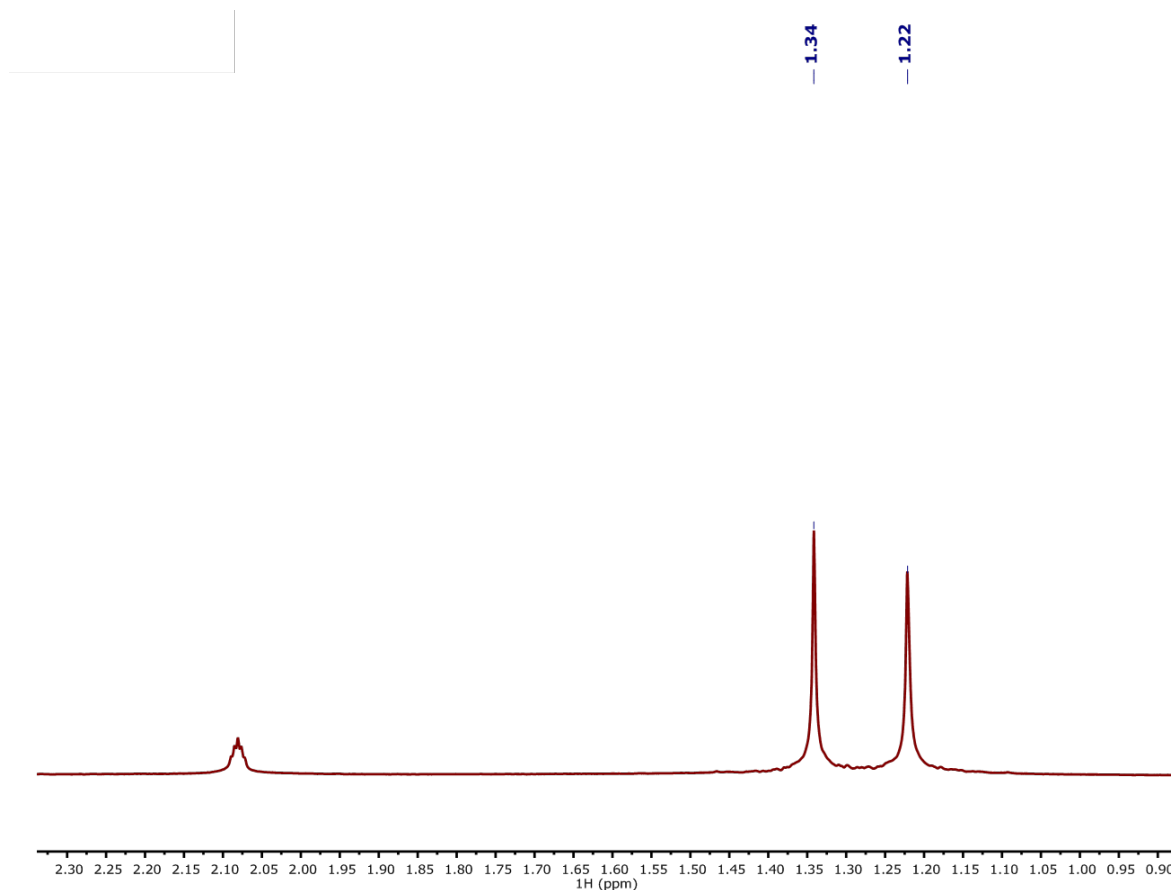

**Figure S1.** <sup>1</sup>H NMR spectrum (500 MHz, *d*<sub>8</sub>-toluene,) of Ti<sub>8</sub>O<sub>8</sub>(OOC<sup>t</sup>Bu)<sub>16</sub> (1). The peaks at 1.34 and 1.22 ppm correspond to the cluster <sup>t</sup>Bu protons; the assignment of the equatorial and axial resonances is not known. Peak at 2.08 is due to toluene.

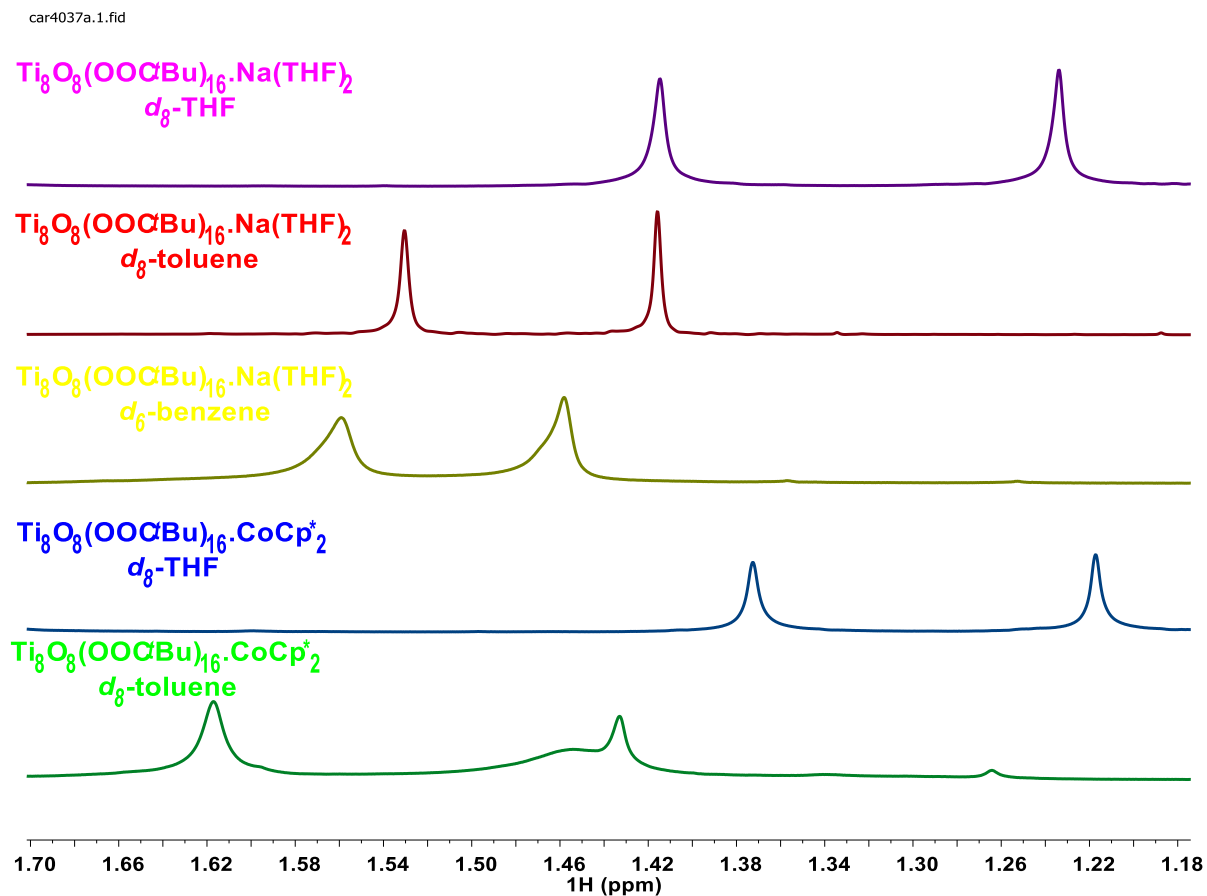

**Figure S2.** Stacked <sup>1</sup>H NMR spectra of  $\text{Ti}_8\text{O}_8(\text{OOC}^t\text{Bu})_{16}^-$  showing the effect of solvent and counter-cation.

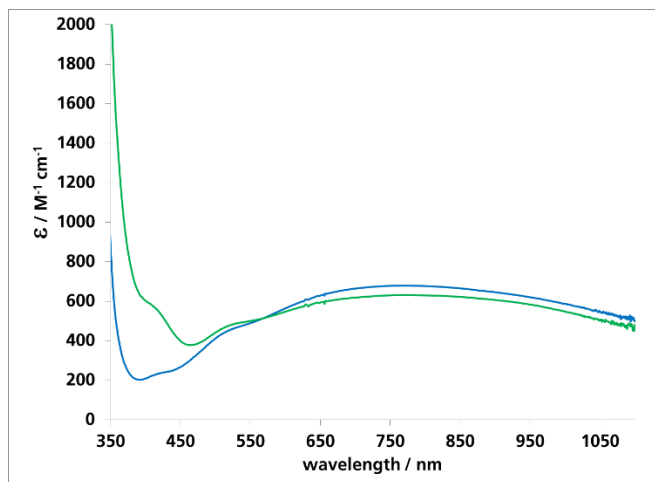

**Figure S3.** UV-vis spectra of  $[\text{Ti}_8\text{O}_8(\text{OOC}^t\text{Bu})_{16}]\text{Na}(\text{THF})_2$  (blue) and  $[\text{Ti}_8\text{O}_8(\text{OOC}^t\text{Bu})_{16}]\text{CoCp}^*_2$  (green) in benzene.

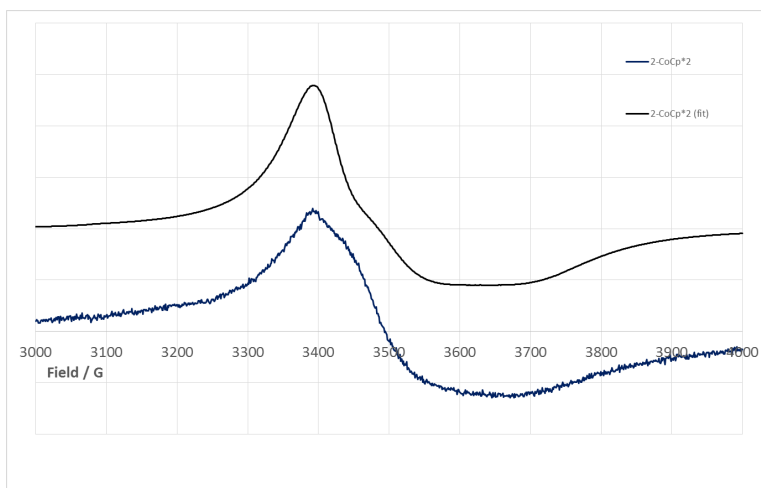

**Figure S4.** EPR spectrum of **2-CoCp\*<sub>2</sub>** collected at 111K as a toluene glass (blue trace). The spectrum was fit (black trace) using the following parameters:  $g = [1.919, 1.899, 1.783]$ ;  $W = [98.0, 228, 258]$ .

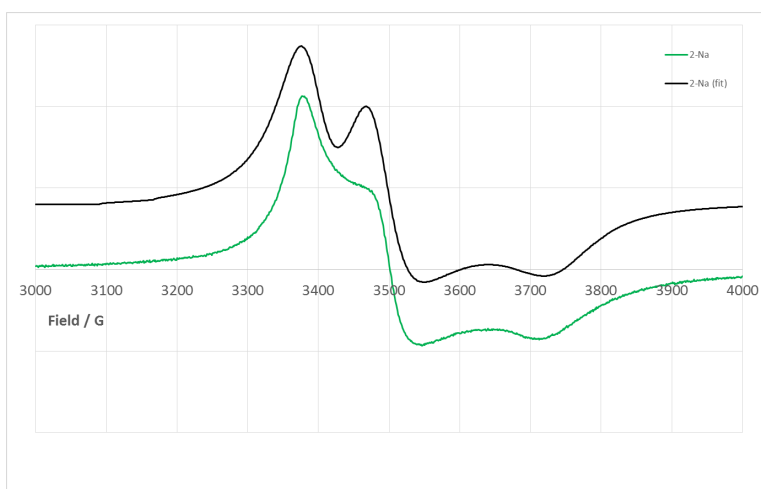

**Figure S5.** EPR spectrum of **2-Na** collected at 111K as a toluene glass (green trace). The spectrum was fit (black trace) using the following parameters:  $g = [1.950, 1.904, 1.781]$ ;  $W = [53.0, 56.0, 81.0]$ .

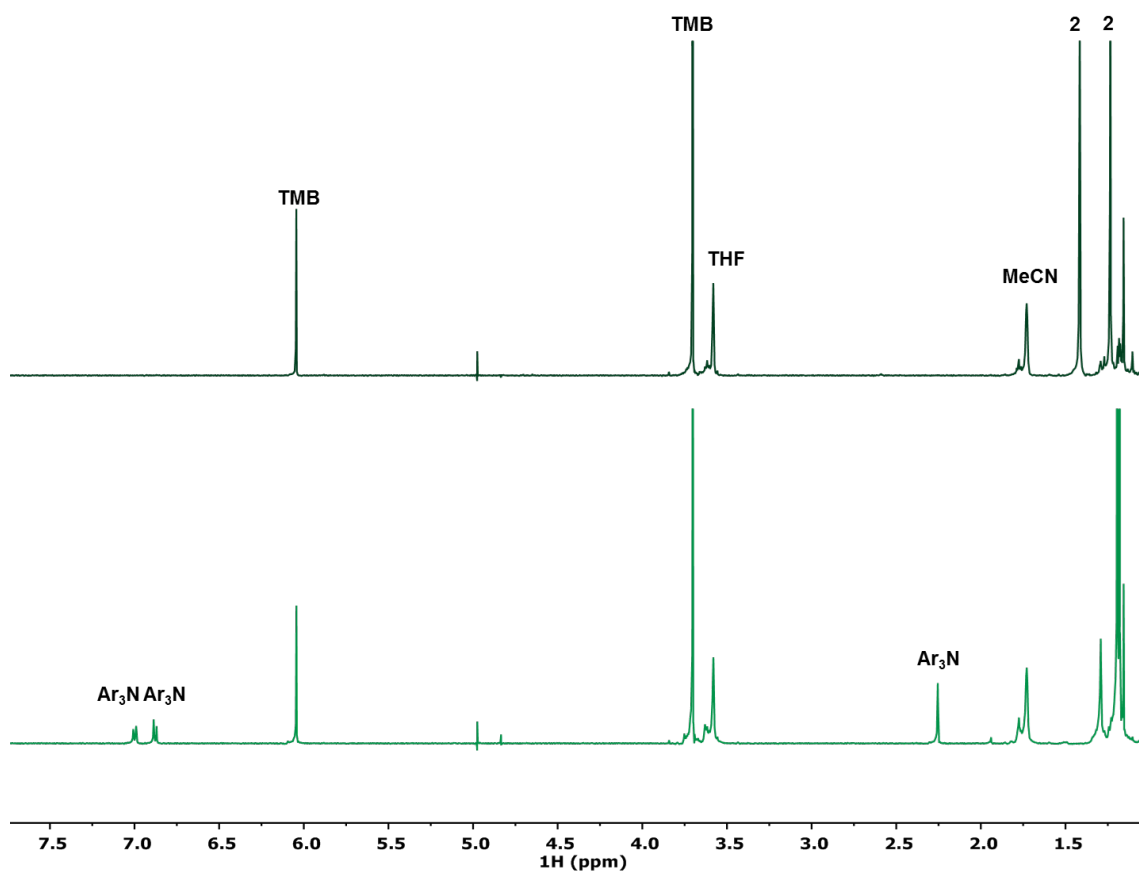

**Figure S6.** Stacked <sup>1</sup>H NMR spectra (*d*<sub>8</sub>-THF, 300 MHz) of (top): **2-Na**; (bottom): **2-Na** + 1 equiv. *p*-tolyl<sub>3</sub>N<sup>+</sup>. TMB (1,3,5-trimethoxybenzene) was used as an internal standard.

#### D. Powder XRD

Powder X-ray diffraction patterns were recorded on a STOE COMBI P diffractometer (monochromated CuK $\alpha$ -radiation,  $\lambda = 1.54060 \text{ \AA}$ ) equipped with an IP-PSD detector in transmission geometry.

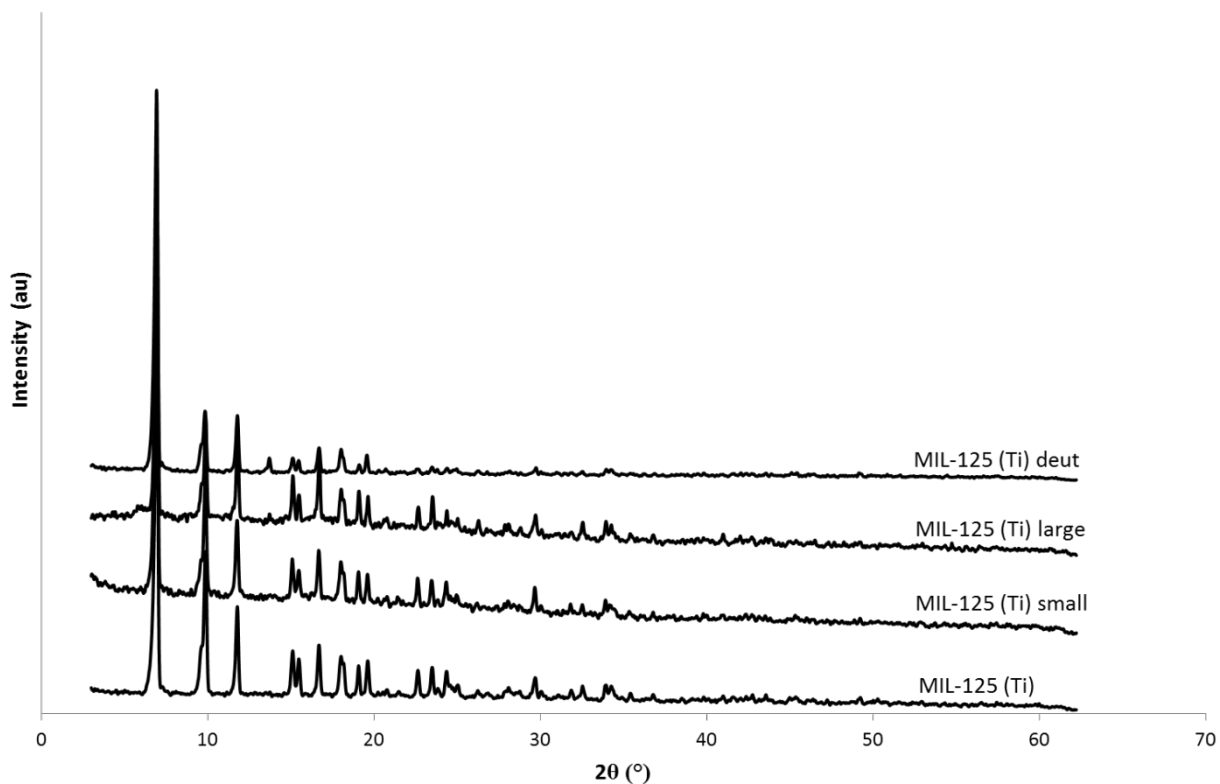

**Figure S7.** Powder X-ray diffractograms of the different MIL-125(Ti) syntheses.

Following reduction of MIL-125 by varying amounts of CoCp<sub>2</sub><sup>\*</sup>, diffraction patterns were recorded to assess the structural integrity of the materials. Structureless Pawley fits were performed on these patterns using TOPAS v6. Patterns were fitted between 2 ° and 50 ° 2θ. Backgrounds were fitted with a 10<sup>th</sup>-order Chebyshev polynomial, and a Thompson-Cox-Hastings pseudo-Voigt function was employed as profile function. From the fits in Figures S9-S11, it is clear that even up to a complete reduction of the material (i.e., 8 e<sup>-</sup> per Ti<sub>8</sub> cluster) MIL-125's structure is retained. However, the appearance of an additional set of reflections, most notably at 10.4 °, 13.9° and 17.7 ° 2θ, which are not allowed for MIL-125 (space group *I4/mmm*) indicate the formation of a second phase upon reduction, likely indicating some structural instability of MIL-125 towards the reduction reaction with CoCp<sub>2</sub><sup>\*</sup>. Indexing of these reflections did not yield a plausible unit cell or structure to identify this additional phase.

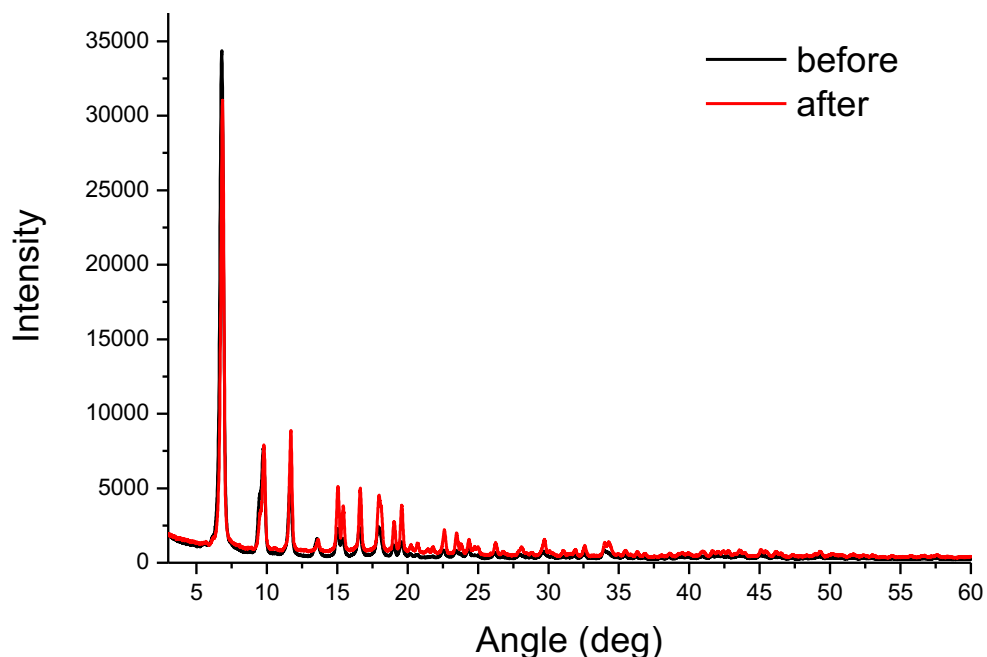

**Figure S8.** Powder XRD diffractograms of MIL-125 upon 2.2 e<sup>-</sup> reduction (“before, black”) and after re-oxidation.



1 e<sup>-</sup>-reduced MIL-125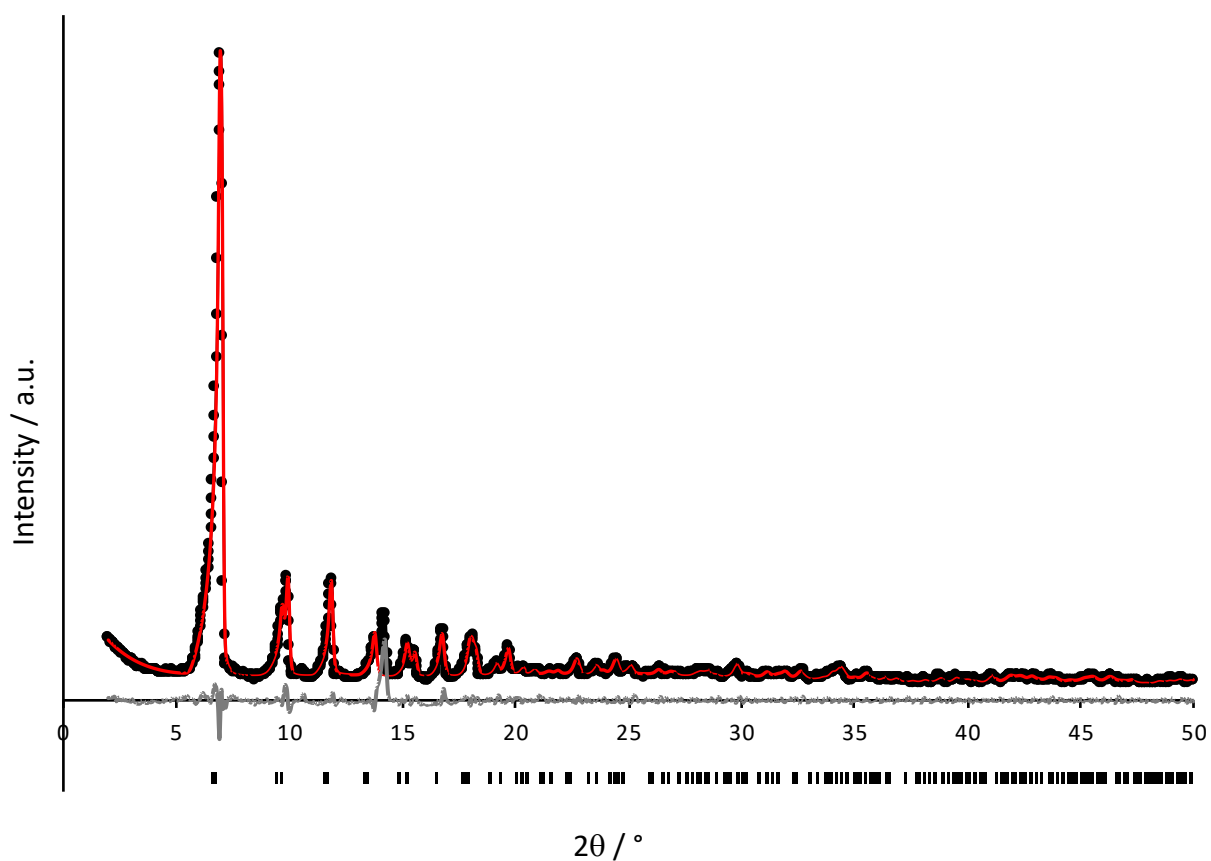

**Figure S9:** Pawley fit of 1 e<sup>-</sup>-reduced MIL-125. Measured data is represented by black dots, whereas the red and gray traces represent the calculated and difference data, respectively. Space group *I4/mmm* (*n*<sup>o</sup> 139); *a* = *b* = 18.6771(79) Å; *c* = 18.2007(84) Å;  $\alpha = \beta = \gamma = 90^\circ$ ; *V* = 6349 Å<sup>3</sup>; *R*<sub>wp</sub> = 9.197; *R*<sub>exp</sub> = 1.377.

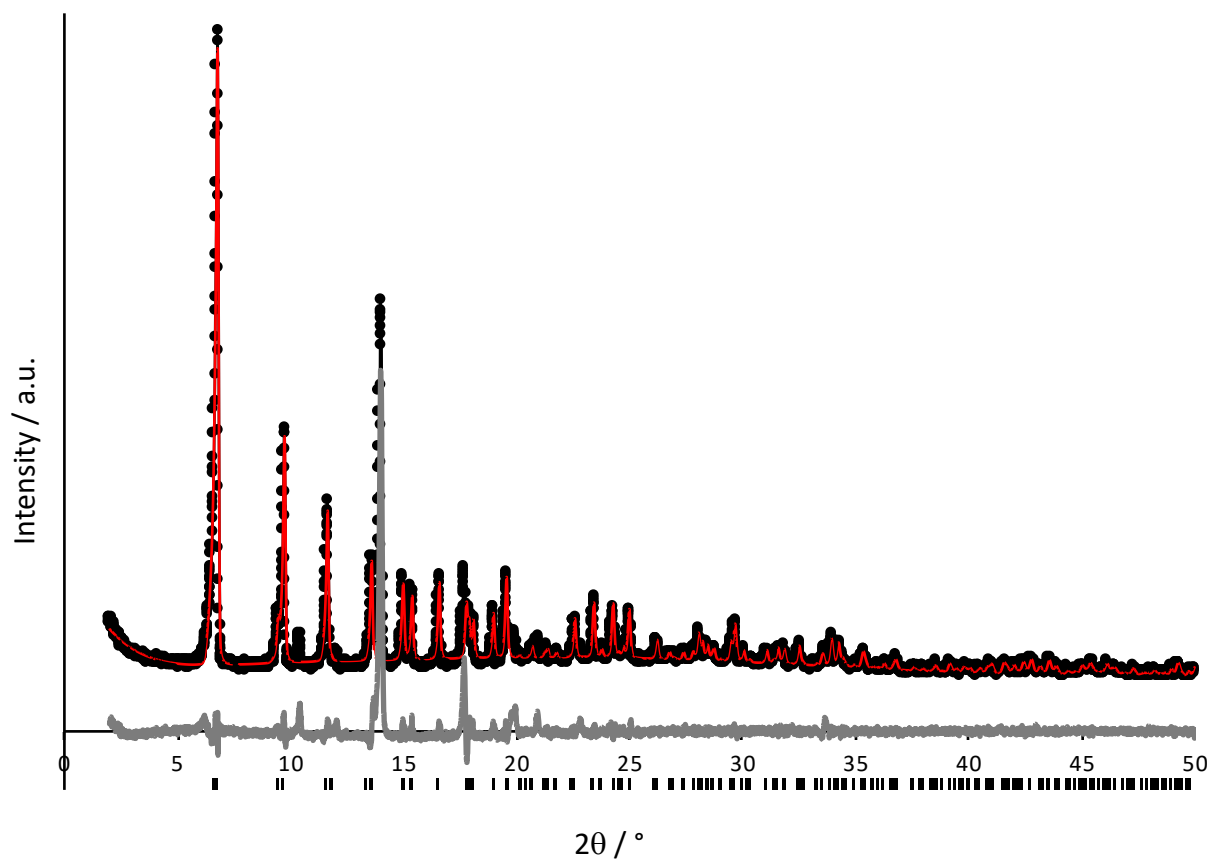

**Figure S10:** Pawley fit of 2  $e^-$ -reduced MIL-125. Measured data is represented by black dots, whereas the red and gray traces represent the calculated and difference data, respectively. Space group  $I4/mmm$  ( $n^\circ$  139);  $a = b = 18.6712(30)$  Å;  $c = 18.1248(31)$  Å;  $\alpha = \beta = \gamma = 90^\circ$ ;  $V = 6318$  Å<sup>3</sup>;  $R_{wp} = 11.962$ ;  $R_{exp} = 1.808$ .

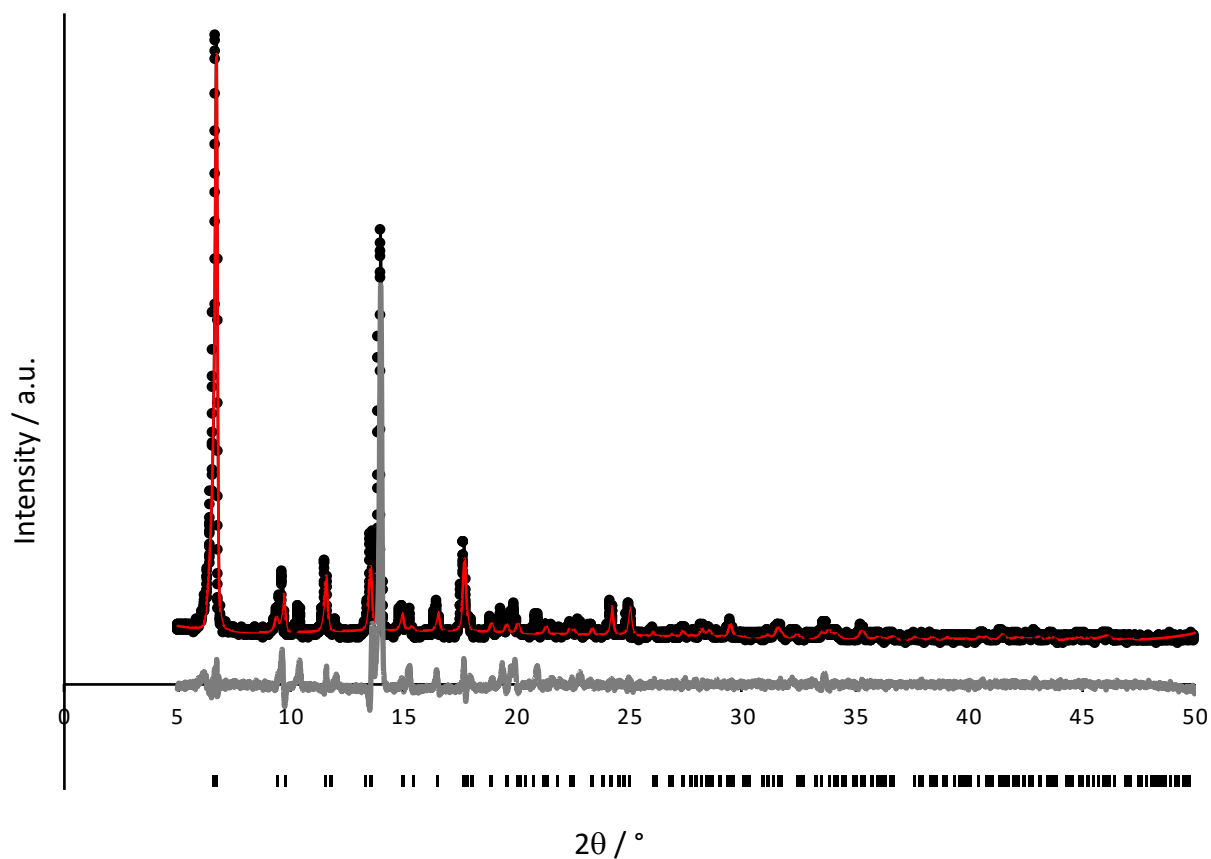

**Figure S11:** Pawley fit of 8  $e^-$ -reduced MIL-125. Measured data is represented by black dots, whereas the red and gray traces represents the calculated and difference data, respectively. Space group  $I4/mmm$  ( $n^\circ$  139);  $a = b = 18.6999(72)$  Å;  $c = 18.0691(78)$  Å;  $\alpha = \beta = \gamma = 90^\circ$ ;  $V = 6318$  Å<sup>3</sup>;  $R_{wp} = 15.102$ ;  $R_{exp} = 2.866$ .

## E. SEM Images

Scanning electron microscopy (SEM) images were recorded on a Philips XL30 FEG microscope, the samples were coated with Au before imaging.

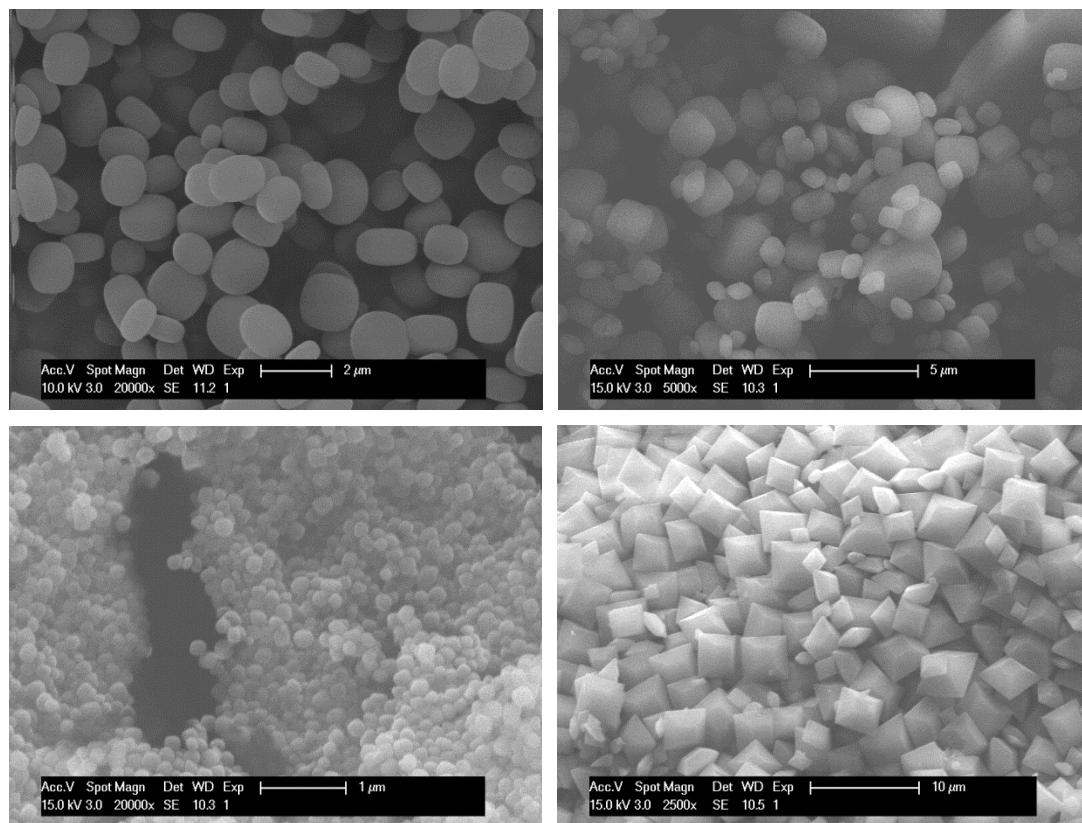

**Figure S12:** SEM pictures of (top left) MIL-125, batch 1 (top right) MIL-125 deuterated, batch 4 (bottom left) small crystals of MIL-125, batch 2 and (bottom right) large crystals of MIL-125, batch 3.

## F. Size Analysis

Size and morphology of MIL-125 crystals were taken from the SEM images (Figure S12). Batches 1 and 4 have ellipsoid morphologies, whilst batch 2 has spherical morphology and that of batch 3 was taken to be octahedron. From the images, the average radii (with error taken to be from the size distribution in the images) were measured and used to obtain the volume of the crystallites. The outer shell was assumed to have a thickness equal to the shortest intercluster Ti-Ti distance + the longest Ti-Ti intraccluster distance (1.088 and 0.8247 nm, respectively).<sup>8</sup> From this, the volume of the entire cluster and that of the interior could be calculated, to give the fraction of Ti<sub>8</sub> clusters within the outer shell (Table S1). This can be used to determine the extent of reduction of the outer shell Ti<sub>8</sub> clusters, if reduction occurred exclusively at the surface with no migration of charge to the interior.

**Table S1.** Calculation of size/volume and fraction of Ti<sub>8</sub> clusters in outer shell of MIL-125 crystallites. The large error in volume for batches 3 and 4 are due to the large size distribution.

| Batch | Morphology | axes / nm |         |        | error / nm |           |           | Volume / nm <sup>3</sup> | Volume (error) / nm <sup>3</sup> | Volume <sub>interior</sub> | Fraction in outer shell (Volume - Volume <sub>interior</sub> ) / Volume | # e <sup>-</sup> in outer shell (1 e <sup>-</sup> reduced) | Assuming all reduction occurs in outer shell only:<br># e <sup>-</sup> in outer shell (2 e <sup>-</sup> reduced) |
|-------|------------|-----------|---------|--------|------------|-----------|-----------|--------------------------|----------------------------------|----------------------------|-------------------------------------------------------------------------|------------------------------------------------------------|------------------------------------------------------------------------------------------------------------------|
|       |            | a         | b       | c      | a (error)  | b (error) | c (error) |                          |                                  |                            |                                                                         |                                                            |                                                                                                                  |
| 1     | ellipsoid  | 850.00    | 700.00  | 300.00 | 50.00      | 100.00    | 100.00    | 7.48E+08                 | 4.60E+08                         | 7.39E+08                   | 0.0113                                                                  | 88.34                                                      | 176.67                                                                                                           |
| 2     | sphere     | 85.00     | 85.00   | 85.00  | 16.50      | 16.50     | 16.50     | 2.57E+06                 | 1.80E+06                         | 2.40E+06                   | 0.0660                                                                  | 15.15                                                      | 30.30                                                                                                            |
| 3     | octahedron | 2650.00   |         |        | 1350.00    |           |           | 8.77E+09                 | 2.14E+10                         | 8.73E+09                   | 0.0045                                                                  | 221.17                                                     | 442.33                                                                                                           |
| 4     | ellipsoid  | 1150.00   | 1150.00 | 600.00 | 350.00     | 350.00    | 200.00    | 3.32E+09                 | 4.22E+09                         | 3.30E+09                   | 0.0065                                                                  | 153.82                                                     | 307.65                                                                                                           |

## G. MOF Uptake Studies

Studies concerning uptake of materials into MIL-125 were included in a companion paper;<sup>11</sup> the text in this section is repeated here for completeness.

In the glovebox, stock solutions of <sup>t</sup>Bu<sub>3</sub>ArOD (20 mM), TEMPOH (40 mM), FeCp\*<sub>2</sub> (20 mM), FeCp<sub>2</sub> (40 mM), (*p*-tolyl)<sub>2</sub>O (40 or 80 mM), diphenylmethanol (40 mM), (*p*-tolyl)<sub>3</sub>N (40 mM), and (*p*-tolyl)<sub>2</sub>CHOH (80 mM) were prepared in C<sub>6</sub>D<sub>6</sub>. The following were added to 5 NMR tubes:

- A. 100 μL TEMPOH, 100 μL (*p*-tolyl)<sub>2</sub>O (40 mM), 200 μL FeCp\*<sub>2</sub>, 100 μL C<sub>6</sub>D<sub>6</sub>  
Final concentration: 8 mM each
- B. 200 μL FeCp<sub>2</sub>, 200 μL <sup>t</sup>Bu<sub>3</sub>ArOD, 100 μL diphenylmethanol  
Final concentration: 16 mM FeCp<sub>2</sub> and 8 mM for the others
- C. 100 μL diphenylmethanol, 100 μL TEMPOH, 200 μL <sup>t</sup>Bu<sub>3</sub>ArOD  
Final concentration: 8 mM each
- D. 100 μL FeCp<sub>2</sub>, 200 μL FeCp\*<sub>2</sub>, 200 μL (*p*-tolyl)<sub>2</sub>O (40 mM)  
Final concentration: 16 mM FeCp<sub>2</sub> and 8 mM for the others
- E. 400 μL (*p*-tolyl)<sub>3</sub>N, 200 μL (*p*-tolyl)<sub>2</sub>O (80 mM), 200 μL (*p*-tolyl)<sub>2</sub>CHOH (80 mM)  
Final concentration: 20 mM each

<sup>1</sup>H NMR spectra for each sample were collected, and the tubes brought back into the glovebox. 4-6 mg of MIL-125 (batch 1) was added to tubes A-D, and 2.7 mg of MIL-125 (batch 1) was added to tube E. A stirring bar was added to the tubes, and the suspension stirred. After 3 h, the stirring bar was removed from samples A-D and the <sup>1</sup>H NMR spectra were collected. The samples were brought back into the box, and stirred for an additional 18.5 h, at which time the stir bar was removed and the <sup>1</sup>H NMR spectra collected again. Sample E was allowed to stir for 16.5 h at which point the stir bar was removed and the <sup>1</sup>H NMR spectrum collected.

Relative integration of the peaks that correspond to each species allowed for qualitative assessment of which substrates were taken up in the pores of MIL-125. These studies reveal that TEMPOH and diphenylmethanol fit in the pores (TEMPOH more so), and also (*p*-tolyl)<sub>2</sub>CHOH. Neither FeCp<sub>2</sub> nor FeCp\*<sub>2</sub> fit in the pores, since their relative integrals were unchanged.

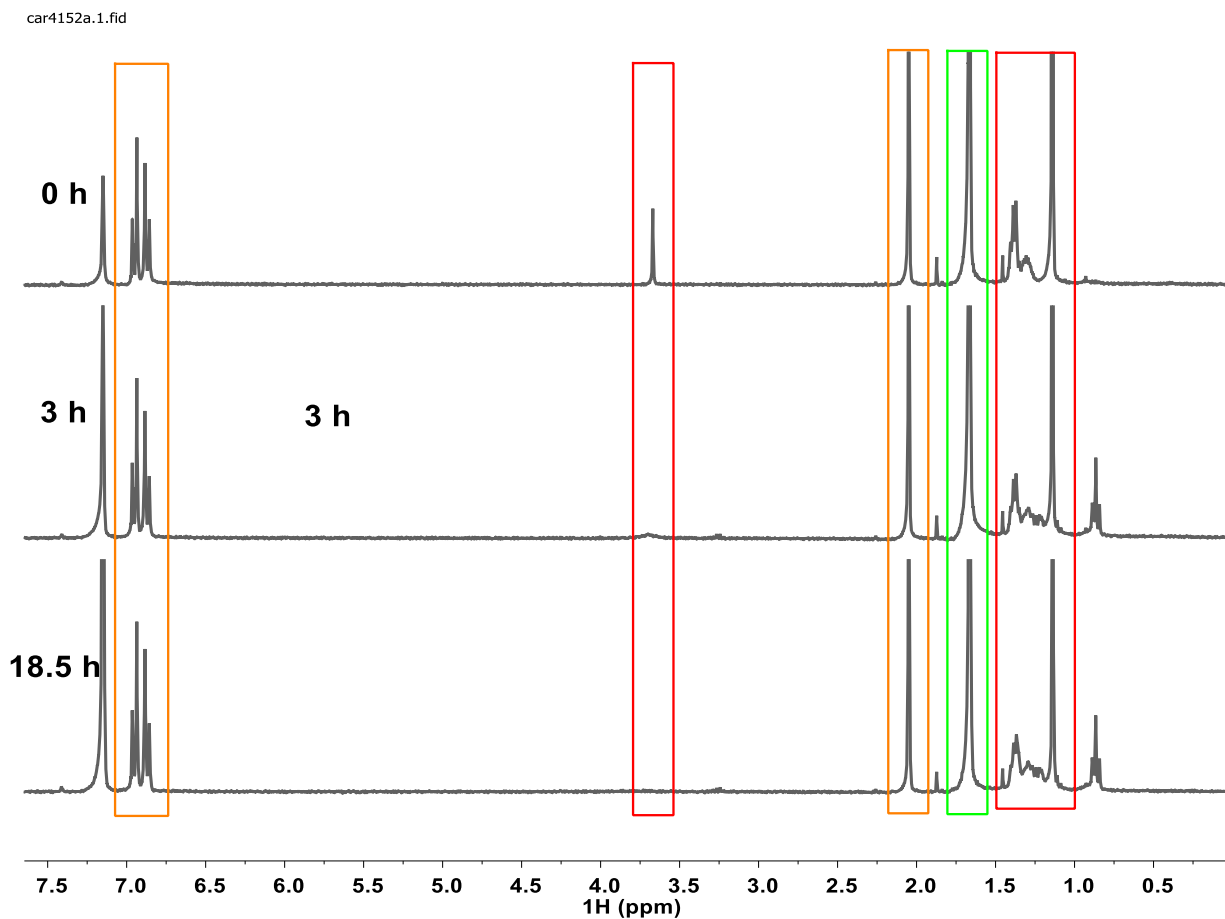

**Figure S13.** Stacked <sup>1</sup>H NMR Spectra (C<sub>6</sub>D<sub>6</sub>, 300 MHz) of sample A. Resonances ascribed to TEMPOH are in red, those of (*p*-tolyl)<sub>2</sub>O in orange, and that of FeCp\*<sub>2</sub> in green.

**Table S2.** Relative integration of resonances for uptake study A. Fraction remaining from t = 0 value noted in parenthesis.

| Time   | TEMPOH (δ 3.67) | ( <i>p</i> -tolyl) <sub>2</sub> O (δ 2.05) | FeCp* <sub>2</sub> (δ 1.67) |
|--------|-----------------|--------------------------------------------|-----------------------------|
| 0      | 0.86            | 6.00                                       | 30.45                       |
| 3 h    | 0.43 (0.5)      | 6.00 (0)                                   | 31.05 (1.02)                |
| 21.5 h | 0.13 (0.15)     | 6.00 (0)                                   | 29.99 (0.98)                |

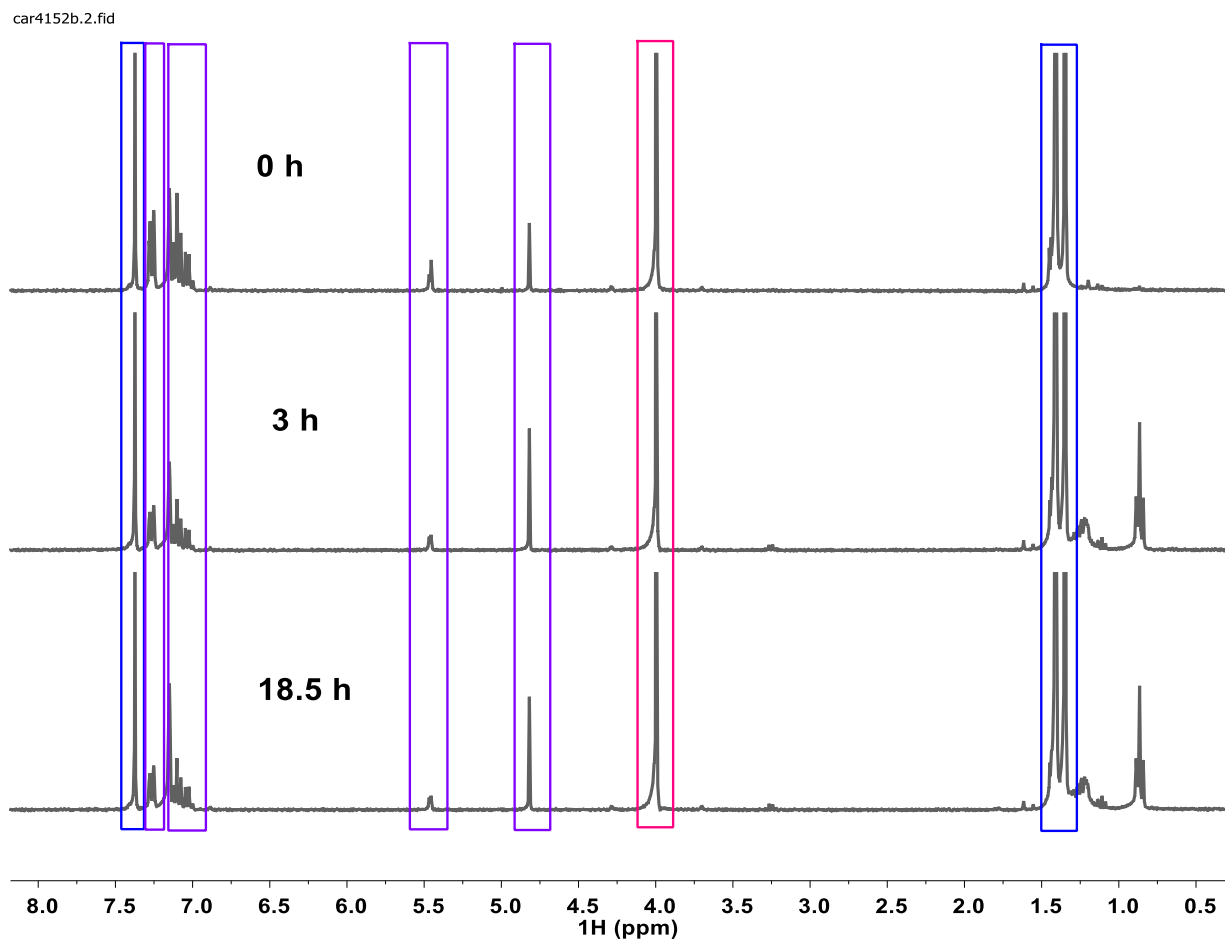

**Figure S14.** Stacked <sup>1</sup>H NMR Spectra (C<sub>6</sub>D<sub>6</sub>, 300 MHz) of sample B. Resonances ascribed to <sup>t</sup>Bu<sub>3</sub>ArOD are in blue, those of diphenylmethanol in purple, and that of FeCp<sub>2</sub> in pink.

**Table S3.** Relative integration of resonances for uptake study B. Fraction remaining from  $t = 0$  value noted in parenthesis.

| Time   | <sup>t</sup> Bu <sub>3</sub> ArOD (δ 7.37) | diphenylmethanol (δ 7.26) | FeCp <sub>2</sub> (δ 4.00) |
|--------|--------------------------------------------|---------------------------|----------------------------|
| 0      | 2.00                                       | 2.31                      | 5.55                       |
| 3 h    | 2.00 (0)                                   | 1.20 (0.52)               | 5.67 (1.02)                |
| 21.5 h | 2.00 (0)                                   | 1.33 (0.58)               | 5.93 (1.07)                |



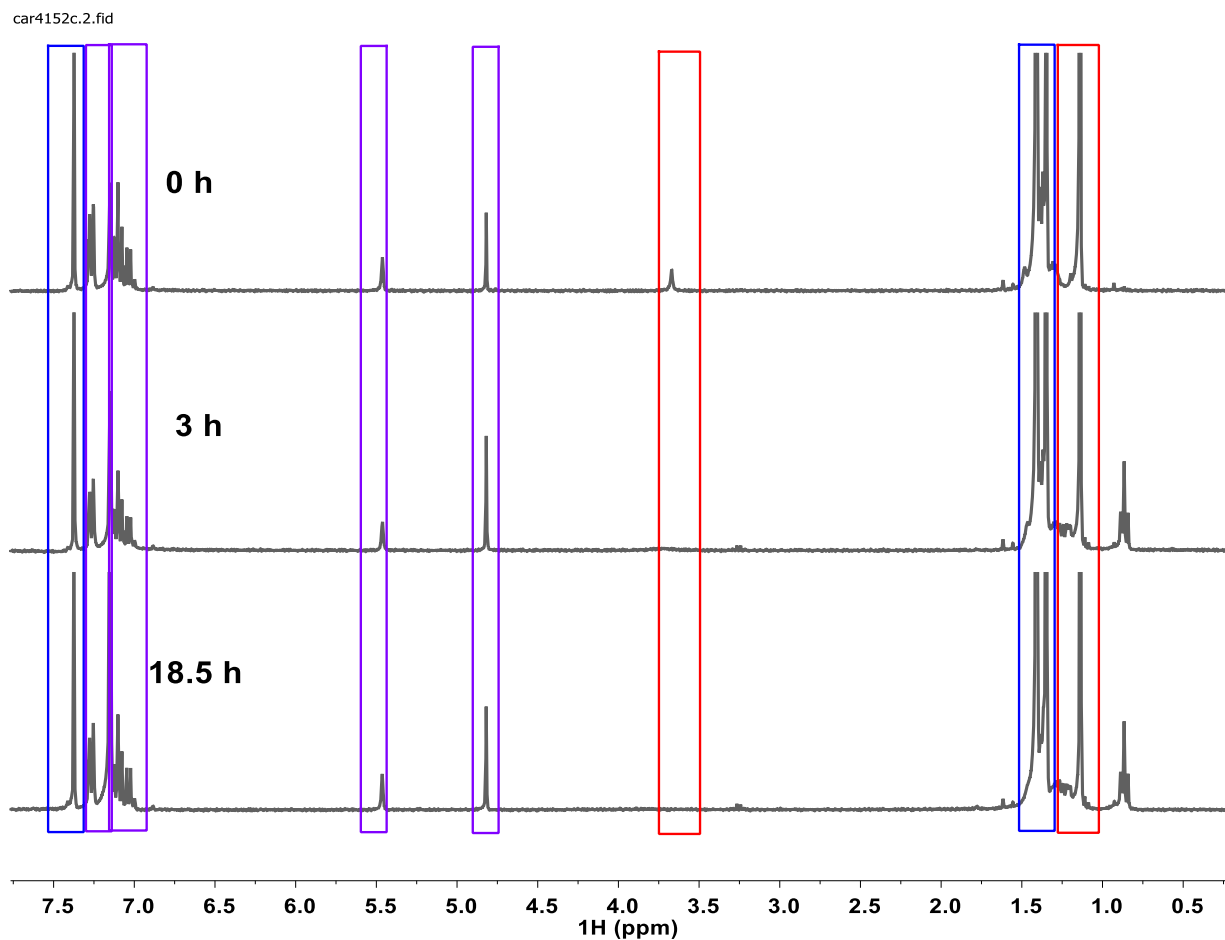

**Figure S15.** Stacked <sup>1</sup>H NMR Spectra (C<sub>6</sub>D<sub>6</sub>, 300 MHz) of sample C. Resonances ascribed to tBu<sub>3</sub>ArOD are in blue, those of diphenylmethanol in purple, and those of TEMPOH in red.

**Table S4.** Relative integration of resonances for uptake study C. Fraction remaining from  $t = 0$  value noted in parenthesis.

| Time   | tBu <sub>3</sub> ArOD (δ 7.37) | diphenylmethanol (δ 7.26) | TEMPOH (δ 3.67) |
|--------|--------------------------------|---------------------------|-----------------|
| 0      | 2.00                           | 2.59                      | 0.49            |
| 3 h    | 2.00 (0)                       | 2.07 (0.80)               | 0.11 (0.22)     |
| 21.5 h | 2.00 (0)                       | 2.64 (1.02)               | 0.05 (0.10)     |

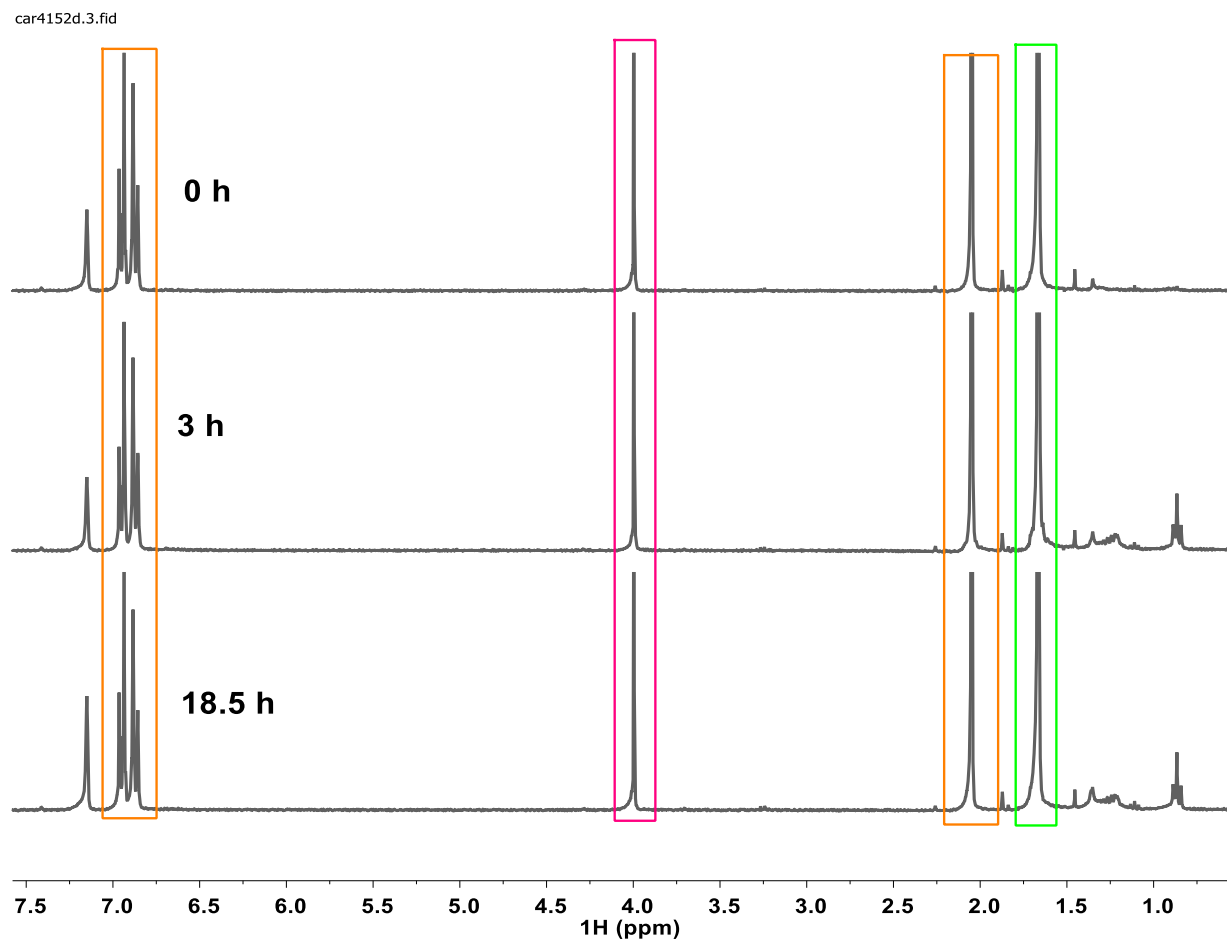

**Figure S16.** Stacked <sup>1</sup>H NMR Spectra (C<sub>6</sub>D<sub>6</sub>, 300 MHz) of sample D. Resonances ascribed to (*p*-tolyl)<sub>2</sub>O are in orange, those of <sup>t</sup>Bu<sub>3</sub>ArOD are in blue, that of FeCp\*<sub>2</sub> in green, and that of FeCp<sub>2</sub> in pink.

**Table S5.** Relative integration of resonances for uptake study D. Fraction remaining from *t* = 0 value noted in parenthesis.

| Time   | ( <i>p</i> -tolyl) <sub>2</sub> O (δ 2.05) | FeCp <sub>2</sub> (δ 4.00) | FeCp* <sub>2</sub> (δ 1.67) |
|--------|--------------------------------------------|----------------------------|-----------------------------|
| 0      | 6.00                                       | 1.53                       | 14.30                       |
| 3 h    | 6.00 (0)                                   | 1.52 (0.99)                | 15.40 (1.08)                |
| 21.5 h | 6.00 (0)                                   | 1.81 (1.18)                | 15.30 (1.07)                |

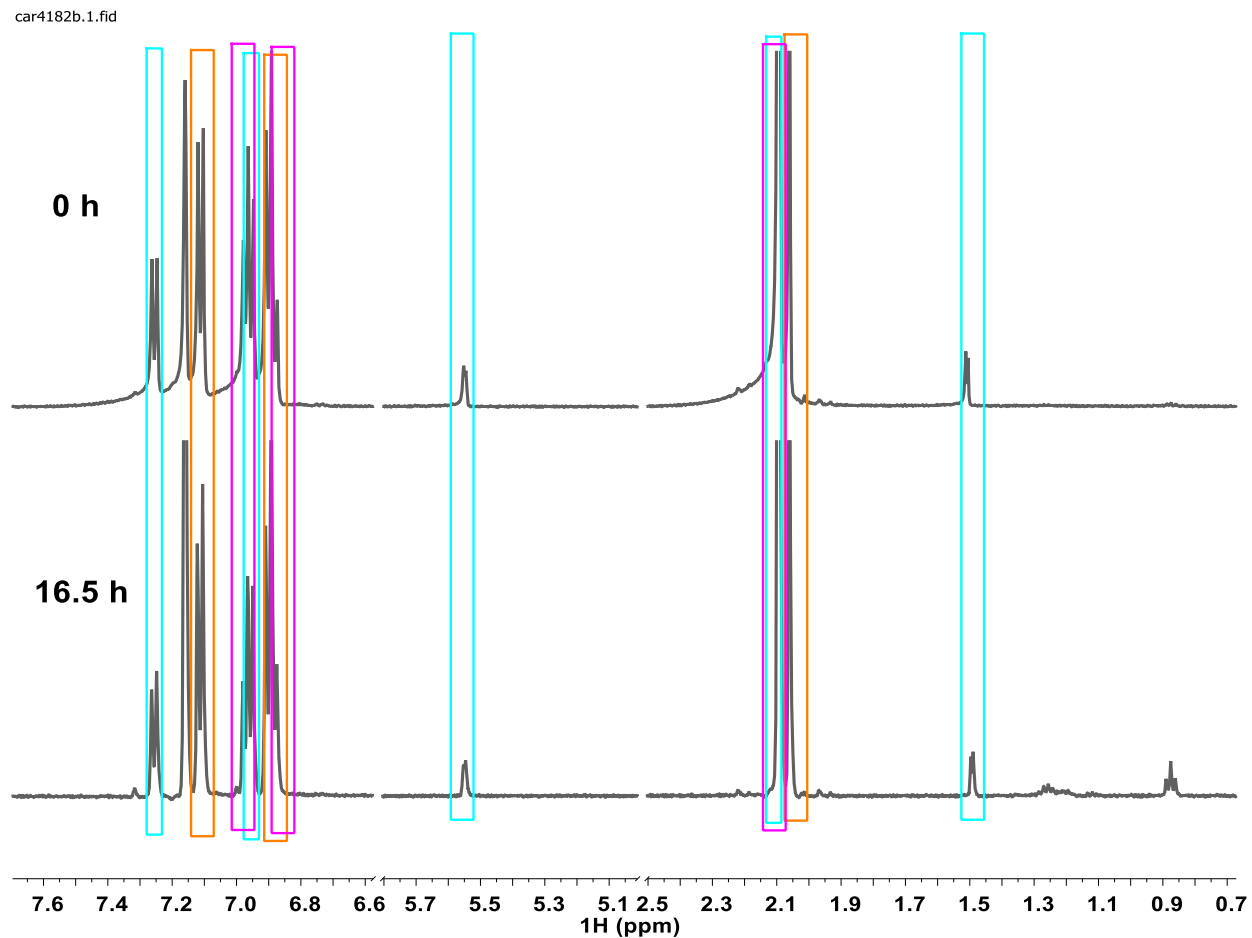

**Figure S17.** Stacked <sup>1</sup>H NMR Spectra (C<sub>6</sub>D<sub>6</sub>, 300 MHz) of sample E. Resonances ascribed to (*p*-tolyl)<sub>2</sub>O are in orange, those of (*p*-tolyl)<sub>3</sub>N are in magenta, and those of (*p*-tolyl)<sub>2</sub>CHOH in cyan.

**Table S6.** Relative integration of resonances for uptake study E. Percent remaining from t = 0 value noted in parenthesis. All resonances of (*p*-tolyl)<sub>3</sub>N overlapped with others, precluding analysis.

| Time   | ( <i>p</i> -tolyl) <sub>2</sub> O (δ 7.11) | ( <i>p</i> -tolyl) <sub>2</sub> CHOH (δ 7.25) |
|--------|--------------------------------------------|-----------------------------------------------|
| 0      | 2                                          | 1.067                                         |
| 16.5 h | 2 (0)                                      | 0.772 (0.72)                                  |

## H. Chemical Reduction of MIL-125

### H.1. Reduction with CoCp\*<sub>2</sub>

In a typical experiment, in the glovebox, a known mass of MIL-125 (5.0 – 15.0 mg) was transferred to a scintillation vial containing a stirring bar. To this was added a THF solution of CoCp\*<sub>2</sub> (2 – 10 equiv, ~ 32 mM) and the reaction stirred. NaBARF<sub>24</sub> or NaPF<sub>6</sub> (0.5 – 10 equiv, ~ 12 mM) was then added as a THF solution. An immediate color change of the solids to dark purple was noticed upon addition of the sodium salt, concomitant with a lightening of the orange/brown solution. The reaction stirred for 15 h, after which the reaction was filtered through a pipette containing a glass filter paper. The solids were rinsed with THF, and the volatiles of the filtrate removed under vacuum. The remaining solids, as well as the filter, were transferred to another vial, and the solids were dried under vacuum (note, this often involved breaking the glass pipette, and hence transferring the glass with the solids). The solids from the filtrate were then taken up in *d*<sub>3</sub>-MeCN, and the <sup>1</sup>H NMR spectrum collected. The insoluble dark solids were suspended in C<sub>6</sub>D<sub>6</sub>, and a known volume of a C<sub>6</sub>D<sub>6</sub> solution containing 'Bu<sub>3</sub>ArO' (slight excess relative to the reducing equiv. added) and the Ar<sub>2</sub>O internal standard. This solution was stirred for at least 5h. At this time, the solution was transferred to an NMR tube, and <sup>1</sup>H NMR analysis was done as described above. For reactions that had ≤ 2 equiv. Na<sup>+</sup>/CoCp\*<sub>2</sub>, a color change from dark purple to white occurred upon oxidation. For reactions that had > 2 equiv. Na<sup>+</sup>/CoCp\*<sub>2</sub>, the solids remained dark. Upon exposure to air, all chemically reduced samples changed color to white.

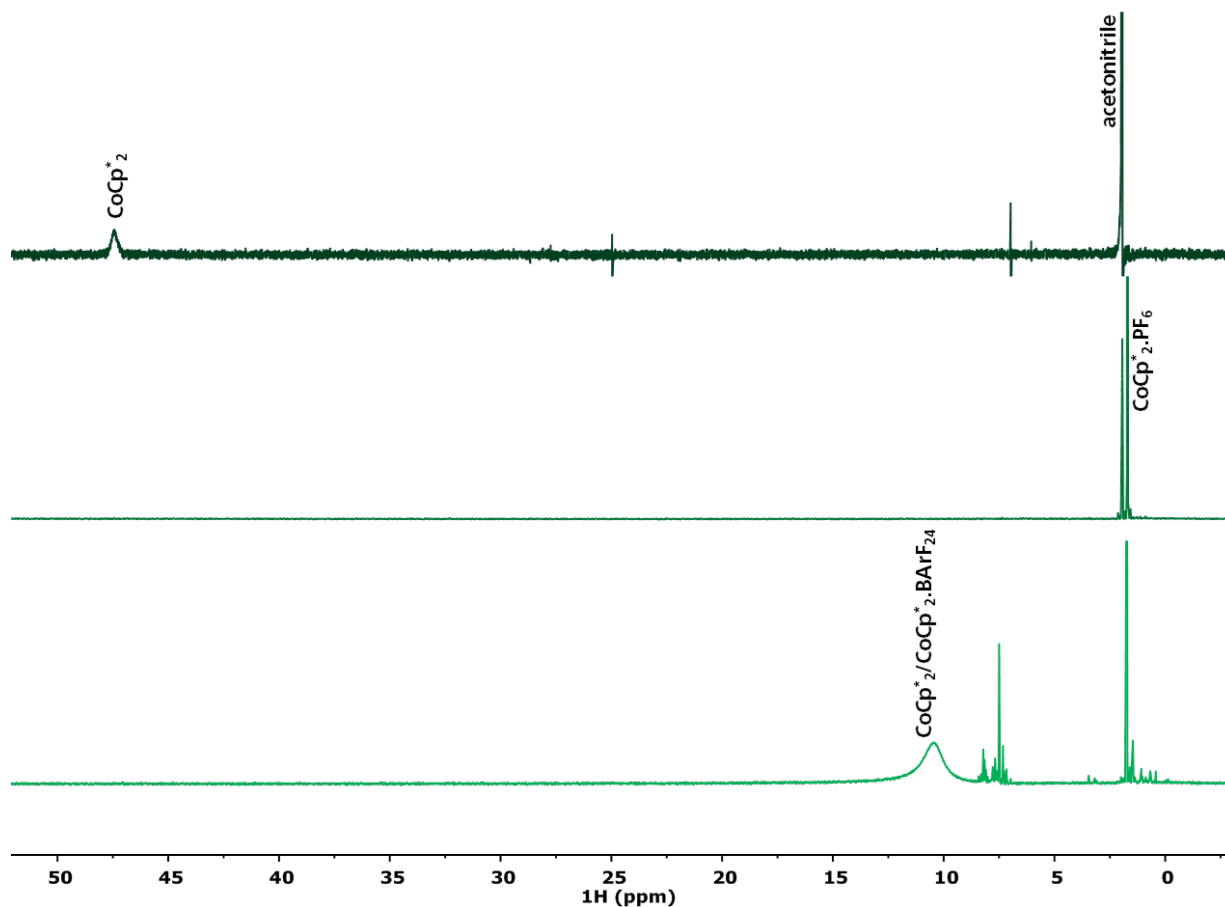

**Figure S18.** Exemplary <sup>1</sup>H NMR (500 MHz, *d*<sub>3</sub>-MeCN) spectra of (top):  $\text{CoCp}^*_2$  (47.4 ppm); (middle):  $[\text{CoCp}^*_2]\text{PF}_6$  (1.70 ppm); mother liquor of the reaction of MIL-125 (batch 2) with 2 equiv. of  $\text{CoCp}^*_2$  and 1.0 equiv. of  $\text{NaBARF}_{24}$ . Unlabeled peaks in the diamagnetic region correspond to solvent,  $\text{BARF}_{24}^-$ , and impurities from the  $\text{NaBARF}_{24}$ . From the chemical shift, MIL-125 was reduced by  $1.6 e^-/\text{Ti}_8$  cluster.

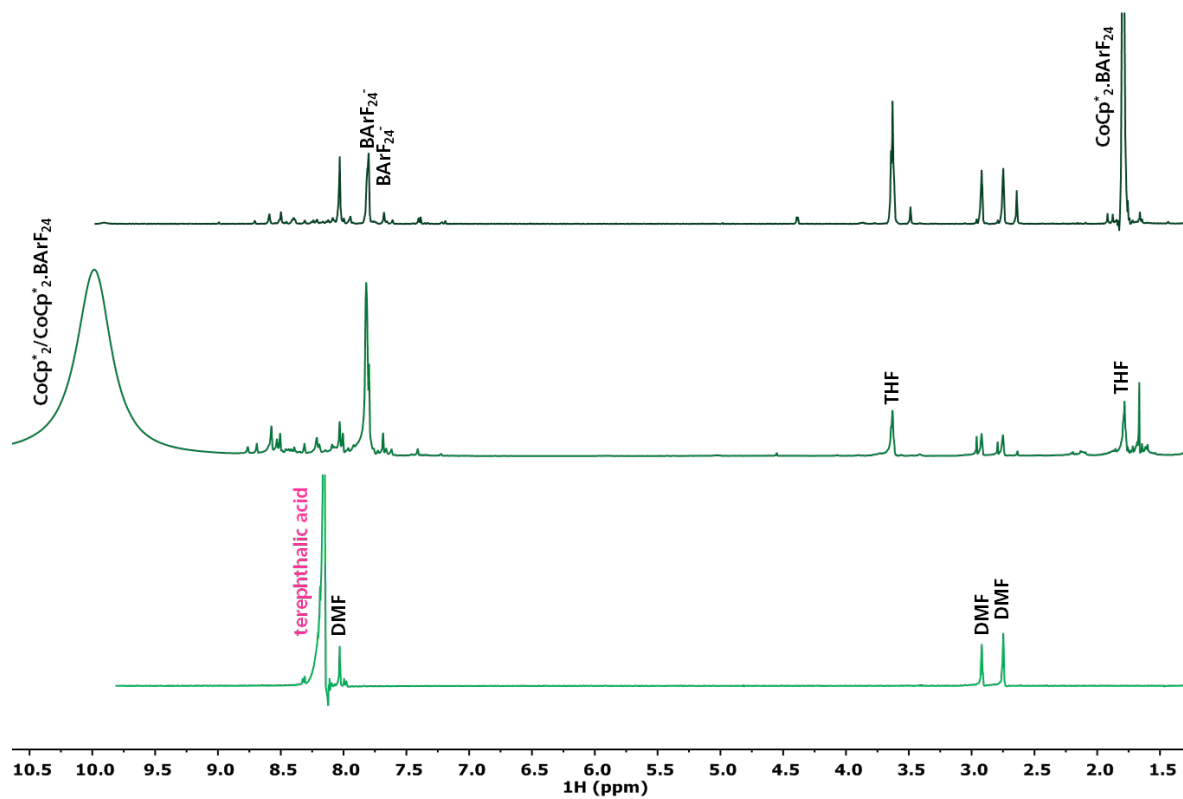

**Figure S19.** Exemplary <sup>1</sup>H NMR (500 MHz, *d*<sub>7</sub>-DMF) spectra of (top): the reaction of MIL-125 (batch 1) with 2 equiv. of CoCp\*<sub>2</sub> and 2 equiv. of NaBARF<sub>24</sub>; (middle): the reaction of MIL-125 (batch 1) with 10 equiv. of CoCp\*<sub>2</sub> and 10 equiv. of NaBARF<sub>24</sub>; (bottom): terephthalic acid.

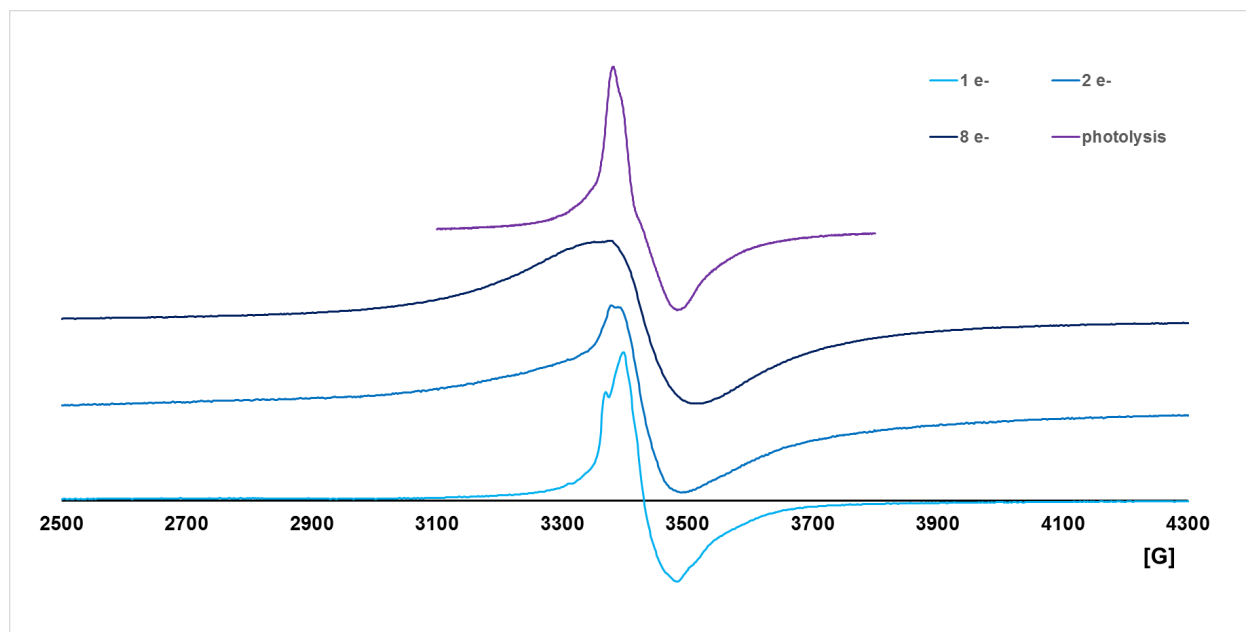

**Figure S20.** Stacked X-band EPR Spectra of reduced MIL-125. (top, purple): photoreduced MIL-125 ( $0.25 e^-/H^+$ ); (middle, dark blue): MIL-125 reduced with 10 equiv. of  $CoCp^*_2/NaPF_6$ ; (middle, light blue): reduced with 2 equiv. of  $CoCp^*_2/NaPF_6$ ; (bottom, sky blue): MIL-125 reduced with 1 equiv. of  $CoCp^*_2/NaPF_6$ ;

## H.2.Reduction with $CrCp^*_2$

### Stock Solutions Preparations.

Solution A.  $d_8$ -THF and  $d_3$ -MeCN (4:1 v/v).

Solution B. 0.10 M Tol<sub>2</sub>O in solution A.

Solution C. 0.20 M NaTFSI in solution A.

Solution D. 0.20 M [2.2.2]-cryptand in solution A.

**Reaction of NH<sub>2</sub>-MIL-125, 3 equiv. of  $Cp^*_2Cr$  and 0~1 equiv. of NaTFSI.** In the glovebox,  $CrCp^*_2$  (~9.7 mg, ~0.03 mmol) was loaded in the J. Young NMR tube (5 mm). If  $CrCp^*_2$  crystals were sticking to the top of NMR tube, a static gun and a glass pipette were used to blow the crystals down to the tube. Internal standard Tol<sub>2</sub>O (0.100 mL solution B, 0.0100 mmol) and solution A (0.1 × 4 mL) were then added into this tube to dissolve  $CrCp^*_2$ . After a <sup>1</sup>H NMR measurement for the determination of the initial amount of  $CrCp^*_2$ , the sample was brought back into the box. To this NMR tube was loaded with MIL-125 (15.6 mg, 0.010 mmol) (or NH<sub>2</sub>-MIL-125 (16.5 mg, 0.010 mmol)) and a tiny stirring bar (8 mm × 1.5 mm). After the suspension of MOFs was stirred for 15~24 h, the stirring bar was then removed and a custom-designed NMR centrifuge was used prior to data collection to enhance the quality of <sup>1</sup>H NMR spectrum. In a typical NaTFSI titration, five 10 μL aliquots of solution C (0.0020 mmol) were added to the NMR tube, followed by stirring for 15~24 h, removal of a stirring bar, centrifuging, and <sup>1</sup>H NMR collection.

**Reaction of NH<sub>2</sub>-MIL-125, 3 equiv. of CrCp\*<sub>2</sub>, 1 equiv. of NaTFSI and 0~1 equiv. of [2.2.2]-cryptand.** In the glovebox, CrCp\*<sub>2</sub> (~9.7 mg, ~0.03 mmol) and NaTFSI (50 μL solution C, 0.0100 mmol) and internal standard Tol<sub>2</sub>O (0.100 mL solution B, 0.0100 mmol) were loaded in the J. Young NMR tube (5 mm), followed by the addition of solution A (0.35 mL). After a <sup>1</sup>H NMR measurement, the sample was brought back into the box. MIL-125 (15.6 mg, 0.010 mmol) (or NH<sub>2</sub>-MIL-125 (16.5 mg, 0.010 mmol)) was added to this NMR tube equipped with a tiny stirring bar (8 mm × 1.5 mm). After the suspension of MOFs was stirred for 15~24 h, removal of a stirring bar and centrifuging, <sup>1</sup>H NMR spectrum was collected again. In a typical [2.2.2]-cryptand titration, five 10 μL aliquots of solution D (0.0020 mmol) were added to the NMR tube, followed by stirring for 15~24 h, removal of a stirring bar, centrifuging, and <sup>1</sup>H NMR collection.

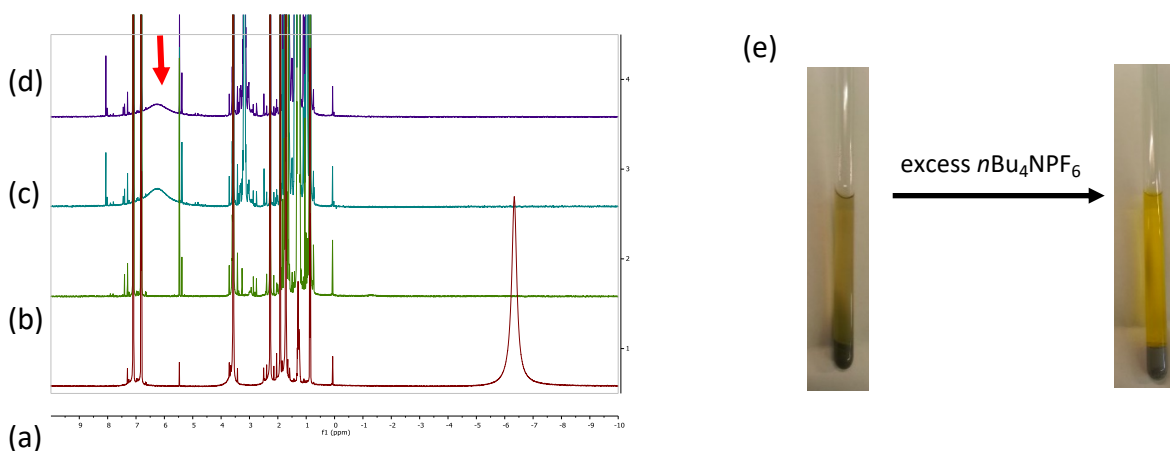

**Figure S21.** (a)-(d) <sup>1</sup>H NMR spectra showing CrCp\*<sub>2</sub><sup>+</sup> (red arrow) is attached on the surface of charged MIL-125 after the reaction of CrCp\*<sub>2</sub> and MIL-125 (0.005 mmol) (*p*-tolyl)<sub>2</sub>O as an internal standard). (a) 0.0025 mmol CrCp\*<sub>2</sub> [*d*<sub>8</sub>-THF and *d*<sub>3</sub>-MeCN (4:1 v/v)]. (b) Addition of 0.030 mmol MIL-125 to sample (a). (c) Addition of 0.025 mmol *n*Bu<sub>4</sub>NPF<sub>6</sub> into sample (b). (d) Addition of 0.025 mmol [*n*Bu<sub>4</sub>N]PF<sub>6</sub> into sample (c). (e) Solution color change of reactions (b) and (d).



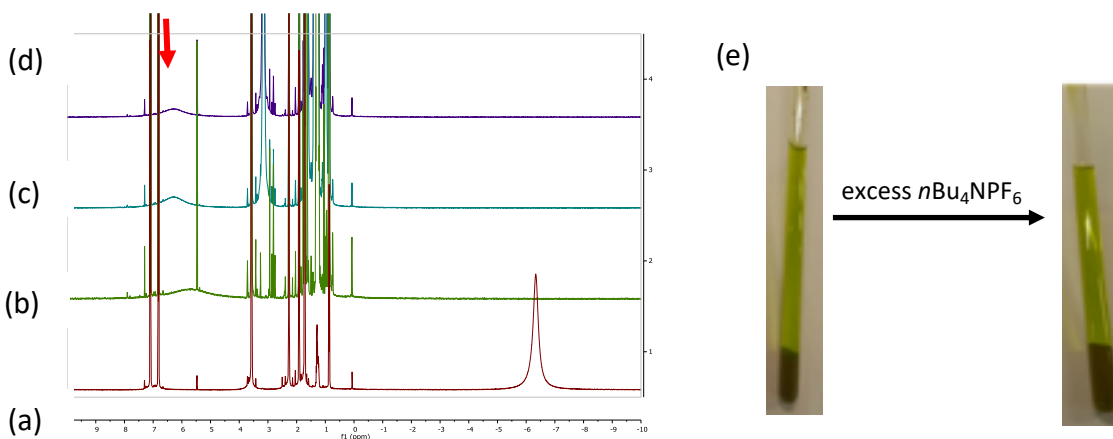

**Figure S22.** (a)-(d) <sup>1</sup>H NMR spectra showing CrCp\*<sub>2</sub><sup>+</sup> (red arrow) is attached on the surface of charged NH<sub>2</sub>-MIL-125 after the reaction of CrCp\*<sub>2</sub> and NH<sub>2</sub>-MIL-125 (0.005 mmol (*p*-tolyl)<sub>2</sub>O as an internal standard). (a) 0.0025 mmol CrCp\*<sub>2</sub> [*d*<sub>8</sub>-THF and *d*<sub>3</sub>-MeCN (4:1 v/v)]. (b) Addition of 0.030 mmol NH<sub>2</sub>-MIL-125 to sample (a). (c) Addition of 0.025 mmol *n*Bu<sub>4</sub>NPF<sub>6</sub> into sample (b). (d) Addition of 0.025 mmol *n*Bu<sub>4</sub>NPF<sub>6</sub> into sample (c). Addition of 0 equiv., 10 equiv. and 20 equiv. of *n*Bu<sub>4</sub>NPF<sub>6</sub> into the mixture led to the liberation of 28.2 %, 45.3 % and 48.0 % of CrCp\*<sub>2</sub><sup>+</sup>, respectively. (e) Solution color change of reactions (b) and (d). The green color is attributed to the suspension of very small particles of charged NH<sub>2</sub>-MIL-125.

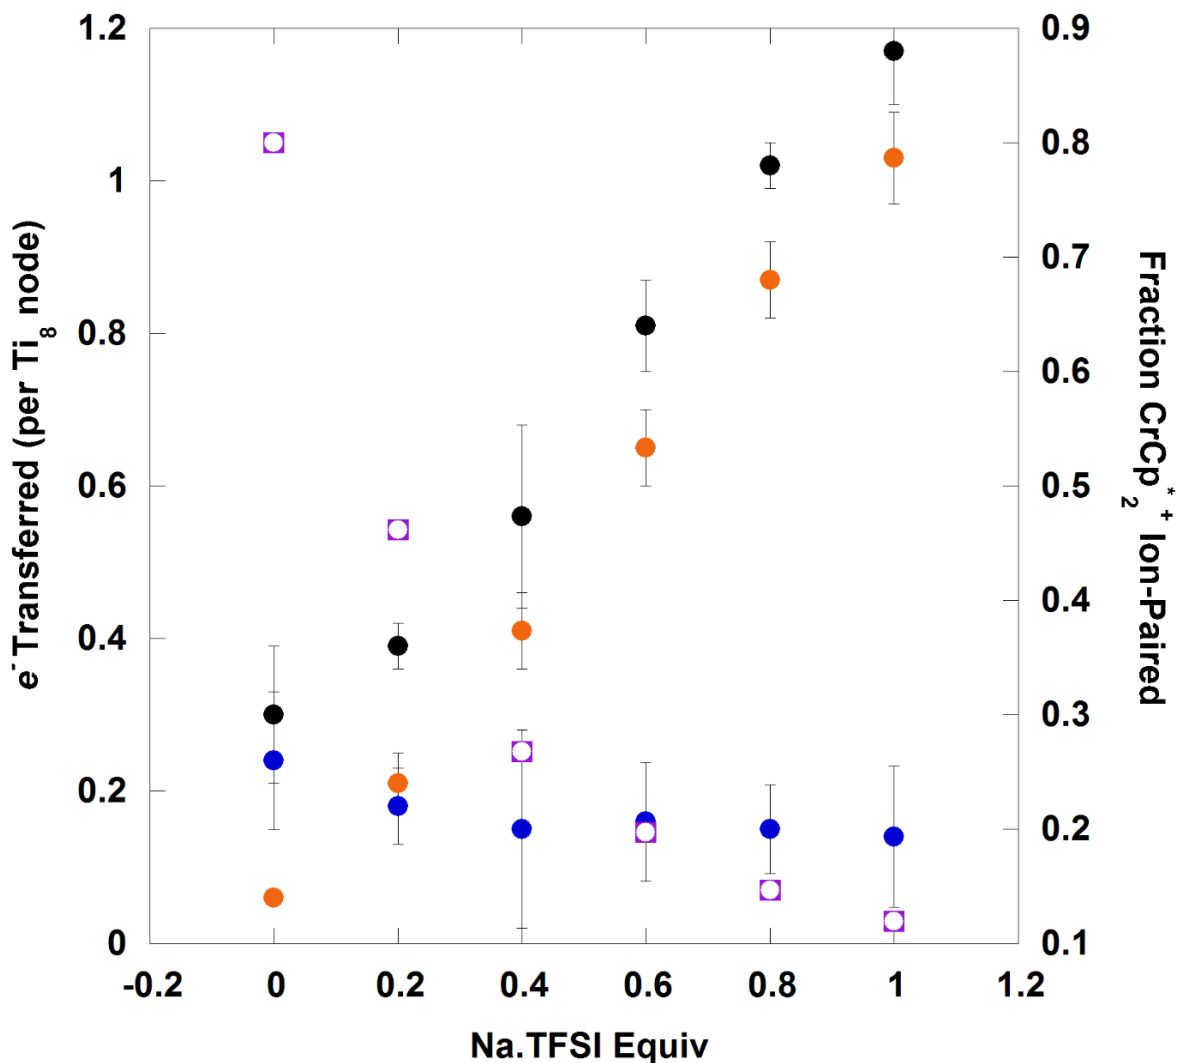

**Figure S23.** Plot of  $e^-$  transferred to NH<sub>2</sub>-MIL-125 (left axis) and fraction of CrCp<sub>2</sub><sup>\*+</sup> ion-paired in reduced NH<sub>2</sub>-MIL-125 (right axis) versus equivalents of NaTFSI added. Orange circles represent the equivalents of Na<sup>+</sup> that are associated with the reduced NH<sub>2</sub>-MIL-125, derived from the CrCp<sub>2</sub><sup>\*0/+</sup> chemical shift. Blue circles represent the equivalents of CrCp<sub>2</sub><sup>\*+</sup> that are associated with the reduced NH<sub>2</sub>-MIL-125, derived from the change in integration of the CrCp<sub>2</sub><sup>\*0/+</sup> resonance upon mixing with NH<sub>2</sub>-MIL-125. Black circles represent the total extent of reduction, and correspond to the sum of the blue and orange circles. Purple squares around white circles represent the fraction of the reduced NH<sub>2</sub>-MIL-125 that is associated with CrCp<sub>2</sub><sup>\*+</sup>.

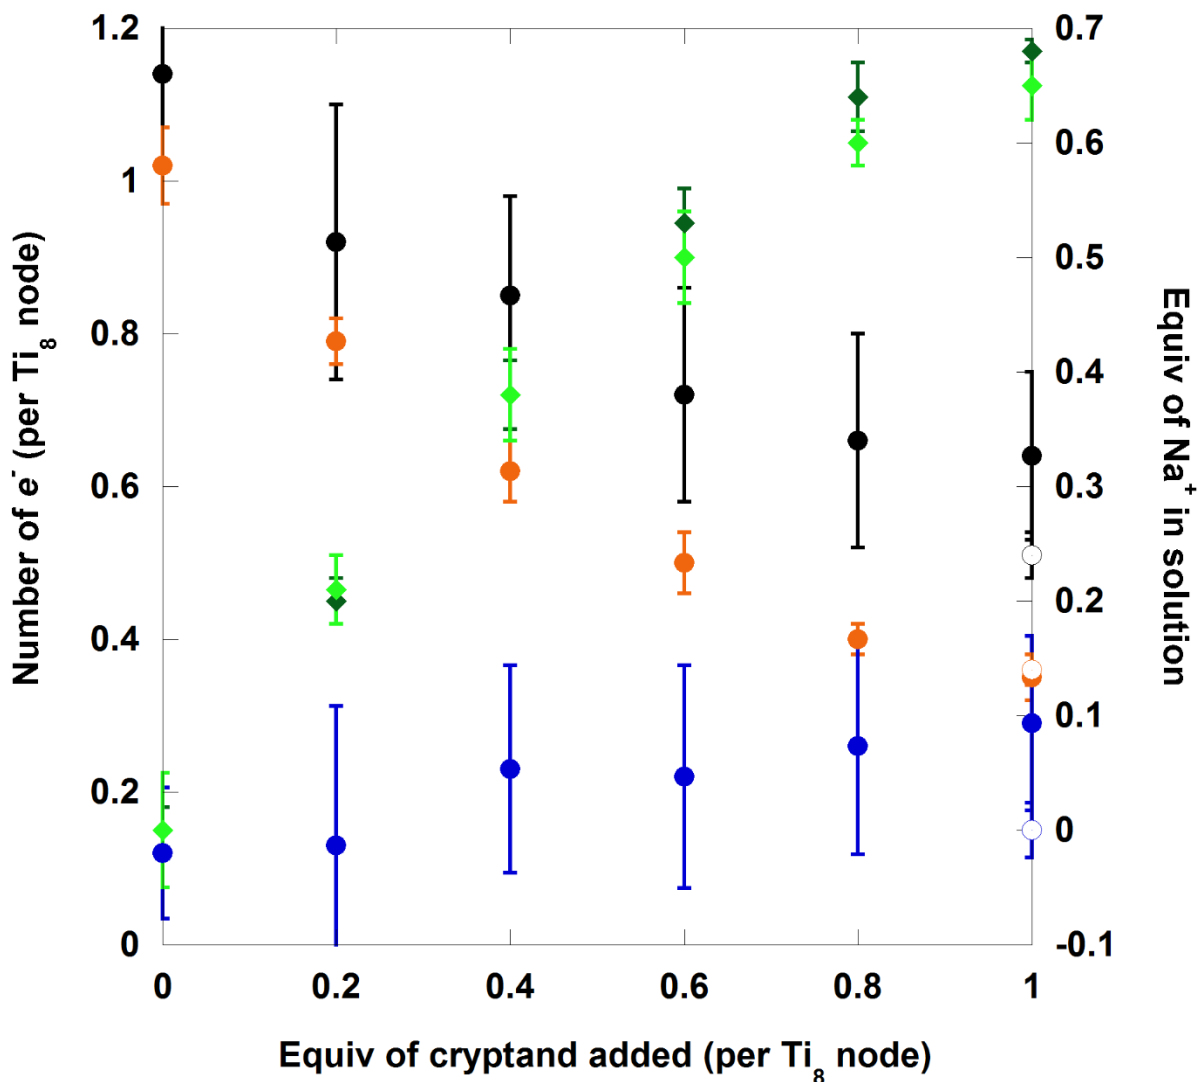

**Figure S24.** Plot of  $e^-$  in NH<sub>2</sub>-MIL-125 versus equivalents of cryptand added (left axis), and equiv. of Na<sup>+</sup> in solution (right axis). Orange circles represent the equivalents of Na<sup>+</sup> that are associated with the reduced NH<sub>2</sub>-MIL-125, derived from the CrCp\*<sub>2</sub><sup>0/+</sup> chemical shift. Blue circles represent the equivalents of CrCp\*<sub>2</sub><sup>+</sup> that are associated with the reduced NH<sub>2</sub>-MIL-125, derived from the change in integration of the CrCp\*<sub>2</sub><sup>0/+</sup> resonance upon mixing with NH<sub>2</sub>-MIL-125. Black circles represent the total extent of reduction, and correspond to the sum of the blue and orange circles. Light green diamonds represent the equiv. of Na<sup>+</sup> in solution, derived from the amount of Na<sup>+</sup> still associated with reduced NH<sub>2</sub>-MIL-125. Dark green diamonds correspond to the equiv. of Na<sup>+</sup> in solution, from integration of the cryptand/cryptand-sodium resonances. Unshaded circles correspond to the number of  $e^-$  in NH<sub>2</sub>-MIL-125 (per Ti<sub>8</sub> node) for the converse reaction: addition of 3 equiv. of CrCp\*<sub>2</sub> and 1 equiv. of Na<sup>+</sup>(cryptand).

### I. ICP-OES Analysis

Inductively-coupled plasma optical-emission spectroscopy (ICP-OES) was carried out using a Perkin Elmer Optima 8300. The standards used were Fluka TraceCert® Ti standard (1000 mg/L Ti in 2% HNO<sub>3</sub>) and Fluka TraceCert® multielement standard solution 1 for ICP as the Na standard (50 mg/L Na in 10% HNO<sub>3</sub>). Samples were added to Falcon tubes using a plastic spatula and digested with 5 mL of EMD OmniTrace® HNO<sub>3</sub>. The concentration of Ti and Na in each sample was determined by the method of standard additions. Each of the samples contained a 100 μL aliquot of the 5 mL stock solution and 0, 20, 100, and 300 μL of Ti standard or 0, 20, 100, and 500 μL of Na standard, and were diluted with 18 MΩ/cm water to a final volume of 10 mL. Reported values are averages of triplicate runs. A blank with no added sample was treated in the same way and run alongside the other samples. The error in the Na/Ti ratios were propagated from the individual errors in [Na] and [Ti]. Errors from the ICP instrument were negligible (<1%), the more significant error is from glassware/handling, and is calculated from the control sample F. In terms of Na/Ti ratio, the error was ± 0.03 or less in each case.

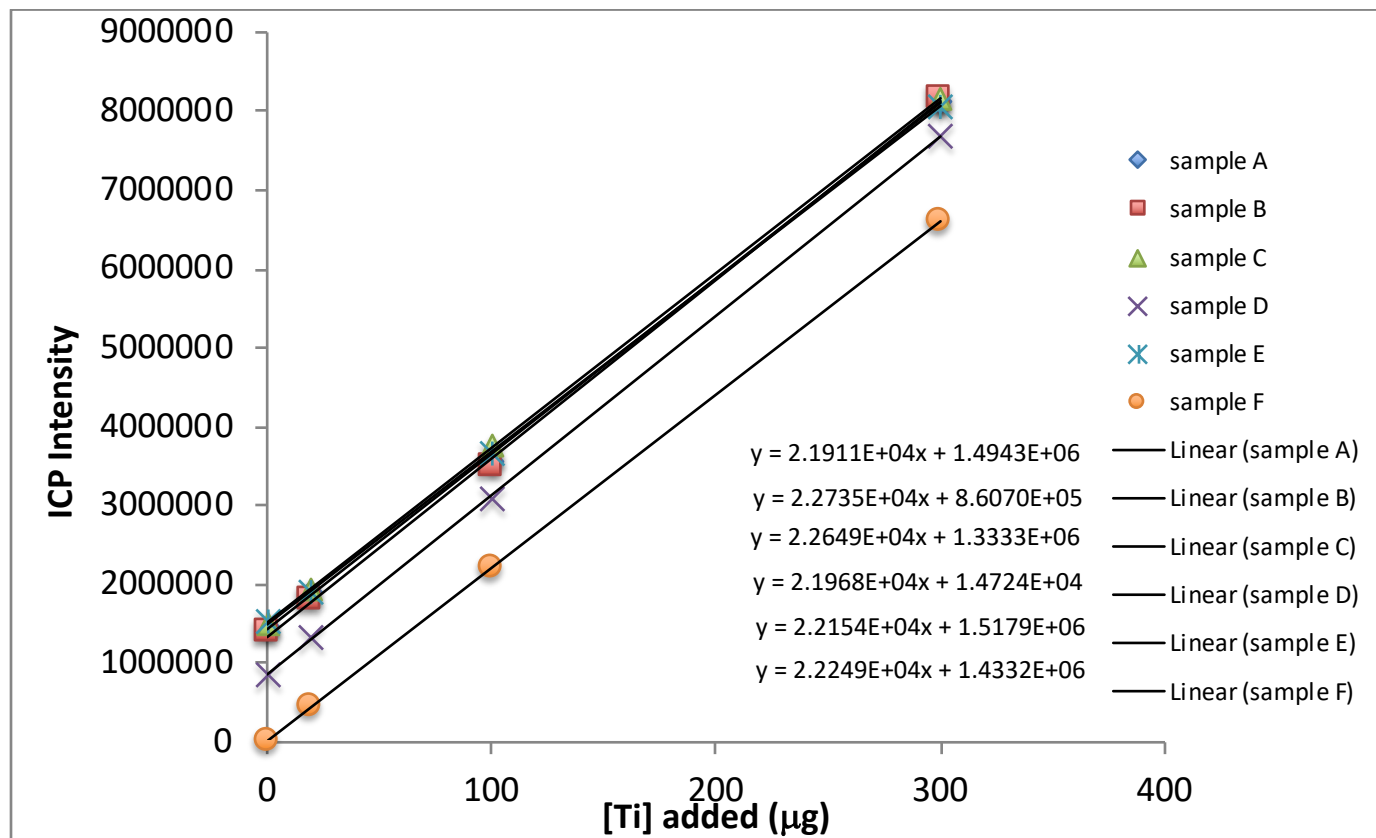

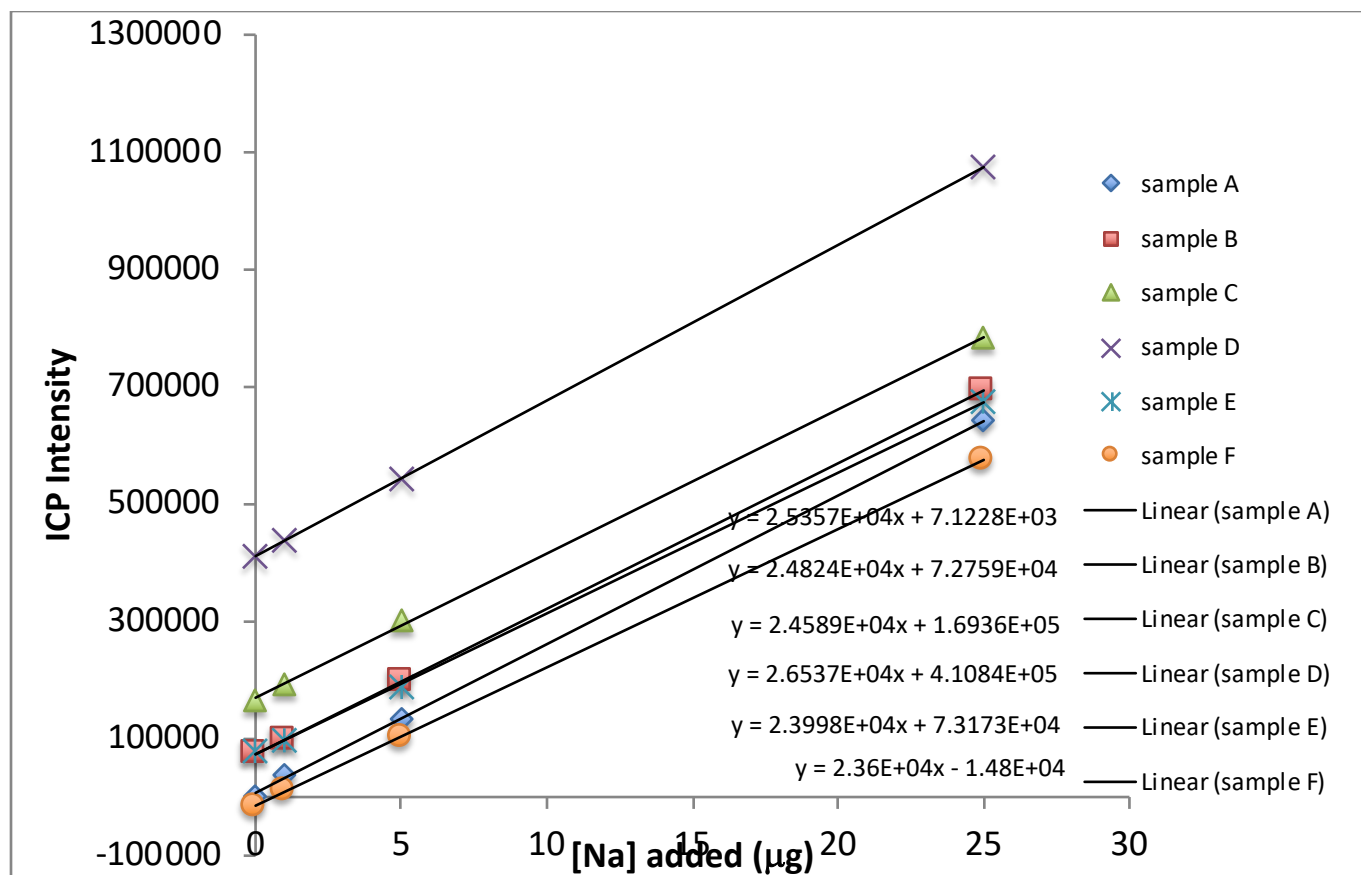

**Figure S25.** Standard addition method to determine the concentration of Ti or Na in several samples, A is MIL-125 without any added Na, B–E are reduced with  $\text{CoCp}^*_2$  in the presence of  $\text{NaPF}_6$  (1, 2, 10, and 1 equiv., respectively), and F is the blank. (top): [Ti] with  $\mu\text{g}$  of Ti added on the horizontal axis; (bottom): [Na] with  $\mu\text{g}$  of Na added on the horizontal axis.

**Table S7.** Calculation of Na/Ti ratio in each sample, and the anticipated ratio for comparison. Sample F is the control experiment.

| Sample      | Found [Na] (mM) | Found [Ti] (mM) | Found Na/Ti ratio | Anticipated Na/Ti ratio |
|-------------|-----------------|-----------------|-------------------|-------------------------|
| A (batch 2) | 0.01            | 13.5            | $0.01 \pm 0.02$   | 0.00                    |
| B (batch 4) | 0.1             | 12.3            | $0.10 \pm 0.03$   | 0.13                    |
| C (batch 4) | 3.0             | 14.3            | $0.21 \pm 0.02$   | 0.25                    |
| D (batch 2) | 6.7             | 7.9             | $0.85 \pm 0.02$   | 1.00                    |
| E (batch 2) | 1.3             | 14.2            | $0.09 \pm 0.03$   | 0.13                    |
| F           | 0.2             | 0.1             | -                 | -                       |

## References

1. A. B. Pangborn, M. A. Giardello, R. H. Grubbs, R. K. Rosen and F. J. Timmers, *Organometallics*, 1996, **15**, 1518-1520.
2. W. L. F. Armarego and C. L. L. Chai, *Purification of Laboratory Chemicals*, Butterworth-Heinmann, London, 2002.
3. V. W. Manner, T. F. Markle, J. H. Freudenthal, J. P. Roth and J. M. Mayer, *Chem. Commun.*, 2008, 256-258.
4. I. J. Rhile, T. F. Markle, H. Nagao, A. G. DiPasquale, O. P. Lam, M. A. Lockwood, K. Rotter and J. M. Mayer, *J. Am. Chem. Soc.*, 2006, **128**, 6075-6088.
5. I. Chávez, A. Alvarez-Carena, E. Molins\*, A. Roig, W. Maniukiewicz, A. Arancibia, V. Arancibia, H. Brand and J. Manuel Manríquez\*, *J. Organomet. Chem.*, 2000, **601**, 126-132.
6. T. Rodima, V. Maemets and I. Koppel, *J. Chem. Soc., Perkin Trans. 1*, 2000, 2637-2644.
7. F. Neese, *QCPE Bull.*, 1995, **15**, 5.
8. M. Dan-Hardi, C. Serre, T. Frot, L. Rozes, G. Maurin, C. Sanchez, G. Férey and G. Maurín, *J. Am. Chem. Soc.*, 2009, **131**, 10857–10859.
9. Y. Fu, D. Sun, Y. Chen, R. Huang, Z. Ding, X. Fu and Z. Li, *Angew. Chemie - Int. Ed.*, 2012, **51**, 3364–3367.
10. T. Frot, S. Cochet, G. Laurent, C. Sassoie, M. Popall, C. Sanchez and L. Rozes, *Eur. J. Inorg. Chem.*, 2010, **8**, 5650–5659.
11. C. T. Saouma, S. Richard, S. Smolders, R. Ameloot, F. Vermoortele, D. E. De Vos and J. M. Mayer, submitted.
